# Supplementary material for: Artificial Neural Network Analysis of Geo Database in Diagnosing Papillary Thyroid Carcinoma
Source: Preprints.org preprint supplement (doi:10.20944/preprints202103.0324.v1), 2021-03-11
Supplement: Supplementary file 1 [file Support Table S2.xlsx]

## Sheet: Sheet1
DDR genes list	EMT genes list	m6a genes list	DEGs list	IS genes list	anaerobic energy metabolism genes list	all genes list	Hypoxia-related genes list	ferroptosis related genes list	lipid metabolism related genes list
RAD23A	PFN2	RBM15B	npc2	CALB2	GGT3P	AADAC	PSMB6	LPCAT3	MOGAT2
RAD17	IL32	VIRMA	tenm1	IL32	ST3GAL6	AAK1	PSMB5	HSPA5	SIN3B
RMI2	NUCB2	IGF2BP2	rxrg	ST3GAL6	SLC2A1	AAMP	HIGD1A	CARS	CTSA
RAD54L	FBXO45	HNRNPA2B1	aldh1a3	KRT1	GLYCTK	AANAT	EGLN2	CDKN1A	MED8
UBE2N	KDM5B	IGF2BP1	lrp4	ADTRP	LDHA	AARS	PSMD1	CS	DGKD
MED1	FHOD1	YTHDF3	dpp4	PTPRB	CYP2E1	AASDHPPT	PSMA7	GLS2	WNT1
POLG	SLC2A1	IGF2BP3	tgfa	KCNE4	CYP2D6	AASS	HIF1AN	ALOX15	ACOX2
RECQL	WNT1	HNRNPC	ryr1	FCGR2B	ALDOA	AATF	PSMC2	SAT1	CYP2E1
ENDOV	RPS6KB1	RBM15	psd3	EVPL	NCAN	AATK	PSMD3	ACSL4	STARD5
PRPF19	PHLDA2	RBMX	eps8	XCL1	PRKACB	ABAT	EP300	EMC2	CYP2D6
APEX2	ERRFI1	METTL14	gabrb2	NTM	MMUT	ABCA1	VEGFA	RPL8	GALC
BRCA2	NTM	YTHDC2	mpzl2	IFNA1	CSPG4	ABCA12	ELOC	FANCD2	MED31
RPA3	MATN3	METTL3	lamb3	CD1C	B3GNT4	ABCA2	PSMC3	NFE2L2	CDK8
RNASEH2B	PLOD1	ZC3H13	pros1	IL12A	XYLT2	ABCA3	PSME4	DPP4	LPCAT3
RAD18	MIR638	WTAP	cdh3	CD79B	HS3ST3A1	ABCA4	UBE2D2	TFRC	PRKACB
ATRIP	MIR217	YTHDF1	tmc6	VNN2	GCK	ABCA5	UBC	ATP5MC3	AKR1C2
ERCC8	LAMA1	YTHDC1	timp1	RCN3	POMC	ABCA6	PSMD11	GPX4	ABCA1
PRKDC	ITGB6	FTO	dusp4	BTLA	AOC2	ABCA8	PSMD10	FDFT1	ANKRD1
BRIP1	EIF3I	YTHDF2	il1rap	DOCK10	MANBA	ABCB1	PSMB10	MT1G	PON1
DDB1	SIM2	ALKBH5	sdc4	CRYBB1	ALDH3A1	ABCB10	PSMD5	NCOA4	VAC14
ERCC5	CSPG4		amigo2	SLC18A2	CYP8B1	ABCB11	ELOB	SLC7A11	PTGS2
BIVM-ERCC5	USP9X		plau	CXCR1	FUT7	ABCB4	PSME2	HSPB1	SYNJ1
POLQ	PTGS2		kcnj2	MCOLN2	BPGM	ABCB6	CREBBP	CISD1	OSBPL5
CHEK1	SPZ1		cited1	GPR35	RXRA	ABCB7	UBB	SLC1A5	MBOAT1
XPA	MMP8		nrcam	S100A12	ENO1	ABCB8	PSMD6		PPARA
NUDT1	DDR1		entpd1	LYZ	PDK1	ABCB9	PSMD13		GC
FANCG	CDH6		mamld1	WAS	PC	ABCC1	PSMB11		PLIN1
RFC5	SGCB		tusc3	FBXO6	NUP210	ABCC10	CA9		MED1
ALKBH3	PDCD4		met	CDH6	FUT4	ABCC2	PSMF1		MED28
POLA2	MED28		dusp6	SPI1	GLYAT	ABCC3	AJUBA		BDH1
RDM1	IGF1R		scel	PDIA3	MAT1A	ABCC4	UBE2D1		CPT2
XRCC1	F2RL2		rab27a	CLEC5A	TRMT112	ABCC5	PSMD14		PI4K2A
CCNL1	MIR194-1		qpct	FCGRT	MPC1	ABCC8	PSMC4		PTGR1
FANCA	LRIG1		dtx4	CEACAM19	PCK1	ABCC9	PSMB2		RXRB
LIG1	NR5A2		ecm1	SLA	GNPDA1	ABCD1	PSMB4		ABHD5
MLH1	NOTCH2		mvp	IL10RA	NQO2	ABCD2	LIMD1		CDS2
CHEK2	PAQR3		s100a11	NR5A2	GCLC	ABCD3	PSMD2		ABCC1
PARP4	DPYSL3		nfe2l3	ANTXR2	FBP1	ABCD4	PSMB7		POMC
EME1	SERPINI1		lpl	EOMES	ADH4	ABCE1	PSMA1		JMJD7-PLA2G4B
RPA1	MCL1		plag1	FCRL1	CYP7B1	ABCF1	PSMA8		RAN
ERCC3	MARVELD1		cfi	GBP5	NDST3	ABCF2	PSMC6		PPT2
FEN1	NREP		pdzk1ip1	NCF1B	ST6GALNAC6	ABCF3	PSMD9		AKR1B15
DNA2	MIR520G		tnik	LSAMP	HS3ST2	ABCG1	RBX1		CYP8B1
RAD1	RHOC		ctsh	GPR171	B3GNT3	ABCG2	PSMC5		RXRA
XRCC6	STAT1		cyp1b1	LIMD2	NUP58	ABHD2	PSMB1		AKR1C1
TREX1	TSC2		serpina1	LRRC32	ENO3	ABHD3	PSMB8		SPTSSA
POLE	POMC		tiam1	EIF2AK2	CYP2A6	ABHD5	PSMA4		ARSE
LIG4	CDH11		upp1	ZDHHC20	UGT3A1	ABI1	VHL		DGKQ
FAN1	NKX3-2		nell2	STAT1	CYP39A1	ABI2	HIF3A		HMGCS2
OGG1	CTHRC1		ggct	IL18BP	SDC3	ABL1	WTIP		KLF4
GEN1	PCBP1		agr2	HSPA1L	CHST6	ABL2	EGLN3		MORC2
SLX1B	MIR190A		igsf1	CDH11	PGK2	ABLIM1	ARNT		ARNTL
POLE2	TNFAIP3		fn1	ATP2A3	NUP98	ABLIM3	PSMD12		DGKE
POLN	SLC30A7		mllt11	CTHRC1	ACSM2A	ABO	PSMA6		INPP4A
RFC3	MARVELD3		lgals3	TREML1	B3GALT1	ABR	EGLN1		FABP5
MPG	ECM1		scg5	PLEKHM3	HS6ST3	ABRAXAS2	PSMB3		LIPE
XRCC5	MMP11		icam1	DACT1	ALDH1B1	ABTB2	PSMD8		FABP7
HES1	TP53INP1		prss23	CD96	NUP85	ACAA1	CUL2		CHAT
HMGB1	BMP7		mfge8	LY86	SLC37A4	ACAA2	PSMA3		PON3
RBBP8	SETD7		pdlim4	HLA-DRB6	RPIA	ACACA	PSMC1		LPIN2
MRE11	SALL1		nrip1	FUT7	ADH1A	ACACB	SEM1		ESYT1
MBD4	PAWR		ctsc	BMP7	AADAC	ACADL	EPAS1		PIK3R3
POLD4	LRP1		bhlhe40	ACAP1	GGT5	ACADM	PSMA5		MBTPS1
XRCC2	DDR2		chi3l1	PGLYRP4	BPNT1	ACADS	PSMA2		VDR
RNASEH2A	ENO1		lmo3	IL9	CYP11A1	ACADSB	EPO		GPCPD1
MUS81	KLF4		slit1	P2RY12	CYP1A2	ACADVL	PSME3		MED26
BACH1	SENP1		adm	MEF2B	NUP133	ACAN	PSMD7		PCK1
RFC1	PLOD3		cdkn1a	FPR3	FDX2	ACAP1	PSMB9		ABCB4
UBE2A	PLAGL2		plxnc1	LRP1	CHST2	ACAP2	PSME1		CYP7B1
RNF8	S100A6		apoe	DDR2	MTRR	ACAT1	HIF1A		SLC27A3
TELO2	TMPRSS4		sfn	KLK7	AKR7A3	ACAT2	CITED2		RGL1
EME2	COL8A2		gabbr2	ADAM8	MECR	ACBD3	UBA52		PEMT
TDP2	F11R		fas	CLMP	B3GALT6	ACD	UBE2D3		PI4KA
PRIM1	ABCG2		lgals1	TREM1	CYP2C18	ACE	PSMD4		FABP4
RAD52	PSTPIP1		cd55	IFITM1	CYP4F8	ACHE	RPS27A		SUMO2
MCM6	SIRT1		alox15b	GLT8D2	ALDH1A1	ACIN1			TGS1
MCM7	FUT4		dusp5	IL20	FMOD	ACKR1			DGKI
POLD2	PIK3R3		pcsk2	GALM	NUP188	ACKR2			SGPP1
ECD	VCAM1		sftpb	ATP10A	ACSM5	ACKR3			RAB4A
MSH4	VDR		cldn10	PTPRM	SULT2B1	ACLY			CYP39A1
POLD1	PRRX2		mxra8	RDH12	KHK	ACO1			MTF1
CENPX	PTX3		g0s2	PSTPIP1	DPEP3	ACO2			PLA2G4C
FANCF	QKI		trim22	RNF125	CHST7	ACOT11			MTMR7
TOP3A	PTPN14		pask	PLEKHO2	CYP2W1	ACOT13			PLA2G4A
NEIL3	IGFBP2		pmaip1	TFEC	PCTP	ACOT2			ACOX3
RECQL5	TNFSF12		inhbb	VCAM1	HSP90AB1	ACOT7			PPM1L
TOP3B	PCOLCE		itga2	CASS4	CYP3A4	ACOT8			TMEM86B
REV1	MACC1		cdh2	RELB	CYP26C1	ACOX1			AKR1D1
RAD51C	AFAP1L2		slpi	COTL1	CHST5	ACOX2			PLD6
BLM	FBP1		diras3	LRCH2	FMO2	ACOX3			DHCR7
TREX2	EML4		tgfbi	ZKSCAN8	CYP2U1	ACP1			PLA2G10
RNF4	DCLK1		comp	ACVR2B	PDHA2	ACP2			GGT5
NEIL1	H19		klk10	TRABD2A	PDHB	ACP5			CYP11A1
TDG	CYP7B1		ceacam6	CD200	OPLAH	ACPP			GRHL1
FANCI	HSPA5		kcnn4	KIF21B	CES3	ACR			ALDH3A2
RIF1	TP63		krt19	CISH	ST3GAL1	ACRV1			PLA1A
PER1	CIRBP		cbln1	TNFSF12-TNFSF13	SGSH	ACSBG1			CYP1A2
RFC4	SKP1		igfbp6	TNFRSF17	CSPG5	ACSL1			INPP5E
RAD54B	CXCL9		ahnak2	USHBP1	CS	ACSL3			LCAT
RPA2	PTPRZ1		phex	PROCR	FMO3	ACSL4			NFYB
WDR48	PROP1		ctss	TNFSF12	PHKG2	ACSL6			LPCAT4
DCLRE1C	STIM1		spock1	GYPC	NAT1	ACSM1			SLC2A4
POLA1	MSX2		alox5	SP110	GSTM2	ACSM2A			ANGPTL4
SMUG1	HDAC2		vcan	CNTFR	ALDH2	ACSM3			FABP3
POLL	SATB1		cxcl8	PCOLCE	PRKACG	ACTA1			MVK
EXO1	IRF8		cks2	THPO	MPC2	ACTA2			EPHX2
RECQL4	KDM3A		opcml	ABCD2	ACSM2B	ACTB			OSBPL2
CDK7	SOX2		tm4sf4	TYMP	SULT1A4	ACTC1			MECR
MAD2L2	ELN		col10a1	MMRN2	GALK1	ACTG1			CHKB
H2AFX	SERPINF1		lamp3	PML	COMT	ACTG2			PLA2G4F
ERCC6	FBLN5		mmp7	CD248	PAPSS1	ACTL6A			FAR1
JUNB	MIR449A		crlf1	P2RX4	SULT1A1	ACTL6B			SPHK2
FANCB	SGCG		spp1	FIBIN	N6AMT1	ACTL8			CYP4F8
POLE4	BRD7		lcn2	FBP1	CYP11B2	ACTN1			TBL1X
HLTF	MSI2		nmu	TNFRSF14	HYAL3	ACTN2			ORMDL1
RAD50	ARHGEF2		ccl18	CD1A	UGT2B4	ACTN3			CEPT1
TOPBP1	EPB41L5		lyz	NRROS	B4GALT5	ACTN4			PLA2G2F
DNTT	MIR208A		mmrn1	ADAT1	ADPGK	ACTR1A			AACS
RRM2B	ANXA1		reln	CCL28	NNMT	ACTR1B			HSD11B2
BRCA1	SETDB1		dlg2	TSPAN32	GYS2	ACTR2			LPCAT2
UBE2B	MIR489		ipcef1	TTC37	TBXAS1	ACTR3			PRKD1
DCLRE1A	ZYX		aox1	N4BP2L1	IMPAD1	ACVR1			CSNK2A1
APLF	MIR187		ryr2	LAMP5	MGST1	ACVR1B			DPEP3
LIG3	LGR4		elmo1	AMIGO3	LDHAL6B	ACVR2A			PIK3CA
MUTYH	SMAD3		slc4a4	IFIT5	HADH	ACVR2B			CGA
FANCD2	PLA2G4A		rassf9	FAM92B	HS2ST1	ACVRL1			CROT
MGMT	MIR200A		pla2r1	HSPA5	SULT1C2	ACYP1			UGCG
NHEJ1	SRF		kit	MLPH	AKR7L	ADA			GDE1
ATR	SLC6A8		cdh16	CXCL9	FDX1	ADAM10			PSAP
APTX	ALX4		clcnkb	HLA-F	ST3GAL4	ADAM11			SLC22A5
MLH3	NRP1		gpm6a	LGALS2	PCCA	ADAM12			PCTP
DUT	CCR9		ephb1	NFKBIE	FUT11	ADAM15			ACLY
PMS2	COL6A2		papss2	ADAP2	GGT1	ADAM17			GLTP
XPC	WNT5B		dpp6	ARHGAP31	ADH1B	ADAM18			STAR
ALKBH2	JAK2		dpt	FCRL2	ACSM1	ADAM19			CYP3A4
GTF2H5	MIR182		tpo	USP12	UBC	ADAM2			CLOCK
NTHL1	PAK4		fmod	PCDH12	PCCB	ADAM20			PLD3
PARP3	PVR		ghr	RGL1	GSTP1	ADAM21			EP300
CHAF1A	GRN		oca2	IRF8	SDC2	ADAM22			CDK4
RBX1	CDC42		mpped2	TGM1	PRPS1L1	ADAM23			PIP4K2C
TDP1	GAB2		clcnka	IGSF10	PPARD	ADAM28			CYP2U1
RAD51	MIR135B		kcnip4	SUSD3	CYP4F3	ADAM3A			SLCO1B3
SHPRH	F3		tff3	IL9R	FBP2	ADAM7			TNFAIP8L3
NBN	MIR1271		ttc30a	SERPINF1	CYP4F12	ADAM8			SEC24B
SPRTN	LAMC1		peg3	HS3ST2	FUT10	ADAM9			MED16
POLD3	CAMK1D		cfd	FLT3LG	PDHA1	ADAMDEC1			FAR2
CLK2	EXOC7		pla2g7	FBLN5	CYP51A1	ADAMTS2			ORMDL2
WRN	HOXB13		cth	MPL	HS3ST3B1	ADAMTS3			ACAT1
RAD51D	FMR1		ccl21	ZAP70	RBKS	ADAMTSL2			GPAM
HUS1	TPM4		lifr	ENO3	ACADM	ADAMTSL3			MTMR12
CUL4B	SERPINB4		fhl1	LAMTOR2	CHST3	ADAR			DHRS7B
XAB2	COL16A1		chrdl1	FYN	CRYL1	ADARB1			CSNK2B
PMS2CL	DICER1		fcgbp	BIRC6	GPC1	ADCY1			INSIG1
APEX1	LOXL3		nupr1	HLA-DPB2	PGK1	ADCY10			CUBN
SSBP1	CXCL14		dio1	GBP2	D2HGDH	ADCY2			FAAH
TP53BP1	OPRM1		prkx	ANXA1	NDC1	ADCY3			GPX2
MSH5	CDKN1A		gdf10	SSTR3	CES2	ADCY6			TNFAIP8
FANCM	ANGPTL4		sord	IL11RA	SLC9A1	ADCY7			PLA2G3
GTF2H1	RAF1		adh1b	DSP	B4GALT6	ADCY8			CDS1
NEIL2	ACTN4		gstm3	SPRR2E	PKM	ADCY9			PIK3C3
MSH6	PEBP1		slitrk5	ARHGAP22	RPEL1	ADCYAP1			PLA2G1B
GTF2H2	TGFB1I1		mfap4	BCL6B	PDK2	ADCYAP1R1			HSD17B8
GTF2H2C	ABI3BP		sod3	PCYOX1L	GLYATL2	ADD1			FITM2
CCNH	HRAS		mt1f	RBM38	CYP2C9	ADD2			SPTLC3
SETMAR	LTBP1		smad9	LILRA5	NUP54	ADD3			PRKACG
SLX1A	STC2		dio2	LYPD5	PGM2L1	ADGRA3			BCHE
RAD23B	MAGEE1		cryab	PILRA	ACSF2	ADGRB1			SGPP2
SPO11	LAMC2		impa2	CCL11	GSTM4	ADGRB2			SP1
RNASEH1	FOXO1		hgd	IL12RB2	THEM4	ADGRB3			AKR1C4
CETN2	ALDH1A1		myoc	NAPSB	PTGIS	ADGRE1			PGS1
FANCC	RACK1		fgf13	SMAP2	ACOT13	ADGRE2			CYP11B2
UBE2T	TRPC5		tnfrsf11b	LTB	AKR7A2	ADGRE5			SPTSSB
RPA4	NAMPT		prom1	FAM83A	DBI	ADGRF5			BAAT
MNAT1	FMOD		sorbs2	NRP1	GYG2	ADGRG1			PITPNM2
HAP1	RHOA		cited2	FLT3	SUCLG2	ADGRG2			ETNK1
ERCC1	SCUBE2		tspan8	RAD54L2	NUP35	ADGRG6			STARD4
RNH1	AGO2		omd	NLRC3	UGT1A3	ADGRL1			TBXAS1
UVSSA	TPM1		efemp1	FYB1	HEXA	ADGRL2			ELOVL3
RAD9A	TPBG		col9a3	XPNPEP2	GPC5	ADGRL3			HADH
XRCC4	MIR10B		aldh1a1	DDX58	MDH2	ADGRV1			PIP5K1A
RNASEH2C	ROS1		bmp8a	ECSCR	CHSY3	ADH1A			FDX1
SYCP3	FSHR		ptx3	CCR9	HAGH	ADH1B			DGKZ
FANCE	ACKR4		slc26a4	LAIR1	PGM2	ADH1C			B4GALNT1
MSH3	PIK3CA		matn2	COL6A2	ACOT7	ADH5			PCCA
PMS1	UBR5		apod	NFAM1	ARNT2	ADH6			PPP1CA
FAAP24	NR1I2		crabp1	IL20RA	PRPS1	ADH7			ARSG
REV3L	MIR221		bmp2	ERAP2	SLC37A1	ADIPOQ			PLD4
RAD51B	AXL		fabp4	JAK2	PDP1	ADIPOR2			ARF1
POLM	OVOL2		bbox1	TNFRSF13B	FH	ADIRF			ACACB
MMS19	MIR491		ca4	SIT1	PFKM	ADK			GPX1
DDB2	TRIM11		neb	IFNG	UBB	ADM			GGT1
ERCC2	MIR152		scgb2a1	CD300E	PKLR	ADNP			LPL
XRCC3	CBLB		cldn8	NHLRC2	GGT7	ADNP2			HDAC3
POLK	VWCE		gldc	N4BP2	CYP19A1	ADO			ORMDL3
MCM2	LYPD3		edn3	PVR	UGT2B7	ADORA1			PCCB
HELQ	TGFBR1		fosb	EBI3	CHAC1	ADORA2A			ACSL5
MSH2	LRG1			BTN3A2	PPP2CA	ADORA2B			NR1H2
DCLRE1B	PMEPA1			PTCRA	LDHC	ADORA3			PPARD
ATM	MMP2			DNAH8	G6PC3	ADPRH			CYP4F3
POLH	AKT2			C3	CMBL	ADRA1A			SLC44A4
RFC2	EP300			TRIM22	ALDOB	ADRA1B			MED21
USP1	CMTM8			TMEM26	HS6ST1	ADRA1D			GNPAT
RNF168	FGF19			RHOH	PPP1R3C	ADRA2A			OCRL
FANCL	PGF			CDK15	GSS	ADRA2C			CYP51A1
SEM1	AQP3			ANKRD22	XYLB	ADRB1			PLEKHA3
CUL4A	FBN1			GGT5	GAPDH	ADRB2			DDHD1
PCNA	NOX1			HEPH	SLC35B3	ADRB3			ACADM
MCM4	VEGFA			PLA1A	FAHD1	ADRM1			PIK3R2
PRIM2	MAP4K4			CD33	EPM2A	ADSL			EGR2
POLI	FOXA2			SCML4	GLO1	ADSS			AGPAT5
GTF2H3	ACTL6A			NOD2	CYP1A1	ADTRP			PPARGC1A
MDC1	MIR181A1			IFI44	TPR	AEBP1			PLEKHA6
PALB2	SFRP2			LOXL3	GYS1	AFAP1			PLA2G2C
POLB	FOXN3			IVL	CHSY1	AFDN			DHCR24
PNKP	MIR149			CLECL1	PHKB	AFDN-DT			SACM1L
MCM3	CADM1			CCL8	UGT1A10	AFF1			ZNF467
FAH	SMC1A			PLXNC1	CHST12	AFF2			MED13L
RMI1	MIR191			TNFRSF10C	PRKACA	AFF3			PNPLA2
MCM5	MIR183			TMEM170B	DECR1	AFG3L2			PRKD3
ERCC4	AOC4P			LINC00426	ACBD6	AFM			PRKAB2
DMC1	PRUNE1			ADCY4	GSTK1	AFP			CYP2C9
TP53	HOOK1			NFYB	PYGB	AGA			SLCO1B1
UNG	FGF1			MRGPRF	SUCLG1	AGAP1			ACSF2
GTF2H4	DNAJB6			DACT3	GUSB	AGAP2			INPP5J
PARP1	CSNK2B			CALHM6	PHKA2	AGER			TPTE
SLX4	NDRG2			JUP	CYP2A13	AGFG1			PIK3C2B
CENPS	PTPN11			MZB1	PYGM	AGFG2			GSTM4
UBE2V2	MYC			PLXNA4	RHD	AGGF1			THEM4
FAAP20	CDH5			CHST2	UGT2B28	AGL			MGLL
FAAP100	RASAL2			KLRB1	GSTA4	AGO2			PTGIS
POLE3	TET3			FNBP1	B4GAT1	AGPAT1			ACSS3
PARP2	APBB1			EMILIN2	NUP205	AGPAT2			ACOT13
	TIMP2			FABP3	ADH5	AGPS			PCYT1B
	ST14			LILRB1	B3GALT4	AGR2			SPTLC2
	MIR181A2			FGD2	AGRN	AGRN			IDI2
	MYL9			DOCK2	GALT	AGRP			DBI
	MMP7			SLC1A7	DPEP1	AGT			MED29
	TCF21			ABI3BP	MAOA	AGTPBP1			SYNJ2
	NMI			HYDIN	EXT2	AGTR1			CHKA
	IGF1			IL1RN	B3GNT7	AGTR2			GK2
	SKI			RUBCNL	ABCC5	AGXT			HEXA
	HDAC4			PSMD1	ACOT1	AHCTF1			CDK19
	ASCL2			PARP14	SLC25A10	AHCY			ALOX15
	CLDN7			LINC00654	SLC25A13	AHCYL1			OSBPL7
	PRKCQ			CSF3R	NDST2	AHCYL2			ACOT7
	SP1			WFDC12	NDUFAB1	AHDC1			ARNT2
	EIF4E			CLIC5	ACAD11	AHNAK			SLC44A1
	FRAT1			TNFSF13	ACOT11	AHNAK2			CREBBP
	EMP3			CD300LB	UGT2B17	AHR			PHOSPHO1
	MRC2			IL24	IDH3A	AHSA1			INPP5F
	LHX2			NTNG2	B4GALT2	AHSA2P			DGKA
	FKBP5			NBEA	PCK2	AHSG			TPTE2
	L1CAM			DCSTAMP	MAT2A	AIF1			MBTPS2
	UBE3C			KIAA1755	PAPSS2	AIFM1			PPP1CB
	PLXND1			RASSF3	PRELP	AIM2			CYP19A1
	S100A4			TNFSF4	SULT1A2	AIMP1			PIAS4
	MATN2			ARHGAP6	IDUA	AIMP2			OSBPL1A
	DVL2			PSMC2	FUT1	AIP			ADPRM
	GATA6			CARD8	MAT2B	AIPL1			FAAH2
	NNMT			LAMC2	ECHS1	AIRE			PIK3CG
	LMNA			HAMP	GGT6	AJAP1			MOGAT1
	MIR361			LAT	GLYATL3	AK1			ARSH
	CX3CL1			BIN2	CSGALNACT2	AK2			ARF3
	ELSPBP1			ATP8A1	GBE1	AKAP1			PIK3C2A
	MIR25			CD163L1	CYP2S1	AKAP10			DGKG
	SMC3			CXCL2	ACO2	AKAP11			PTGES
	RUNX2			CD69	GSTA2	AKAP12			CPNE6
	COL6A3			MGAT4A	UGT1A7	AKAP13			ACP6
	DST			SLCO5A1	CES1	AKAP17A			SLC10A1
	LRP6			GCSAML	SLC35D1	AKAP2			OXCT1
	ALAD			SPARCL1	ACOT2	AKAP3			CERS3
	GLI2			CD74	ACSM3	AKAP4			SLC27A1
	WT1			PSMD3	AGL	AKAP5			MED14
	IL4			ALDH1A1	SLC25A1	AKAP6			PLD1
	CXCR2			CD244	RHCE	AKAP7			MED4
	MIR888			FMOD	POM121	AKAP8			FABP6
	RNF111			SLC15A3	AIP	AKAP8L			UGT8
	GKN2			STAC3	IDH3G	AKAP9			CYP1A1
	HINT2			PLPPR4	GLCE	AKR1A1			EBP
	BMP4			DOCK8	CYP4F22	AKR1B1			DGKH
	IGSF8			WDFY4	LALBA	AKR1B10			PRKACA
	FOXQ1			RGS1	SORD	AKR1C3			LYPLA2
	ACTA2			SIGLEC11	DERA	AKR1C4			PPARG
	SNAI2			CD1B	PRPS2	AKR1D1			NRF1
	HES1			UBD	CYB5B	AKR7A2			MED19
	IL22			PDE4B	CHST11	AKR7A3			ALOX15B
	HDAC3			PBX4	CYB5R3	AKT1			INSIG2
	SDC2			PRLR	SLC37A2	AKT2			DECR1
	MSLN			ACSM5	GLYATL1	AKT3			GPAT2
	HMGB1			SULT2B1	UGT3A2	ALAD			AMACR
	CD82			NOVA2	PYGL	ALAS1			ACBD6
	GJB2			IGLL1	MDH1	ALAS2			NFKB1
	TCF3			REST	ABO	ALB			CERS6
	ING4			UTS2	SDC1	ALCAM			FHL2
	MIR216A			JAM2	CYP3A43	ALDH1A1			GBA2
	CCL19			NECTIN3	CHPF	ALDH1A2			AWAT2
	EPHA4			GIMAP7	CYP2R1	ALDH1A3			DEGS2
	MIR375			GNGT2	GCLM	ALDH1B1			HILPDA
	ZBTB33			LAG3	PTGS1	ALDH1L1			DECR2
	MAP3K3			FERMT3	HAS3	ALDH2			PNPLA5
	CYP4Z1			ASRGL1	LUM	ALDH3A1			ACSL1
	MSX1			EDAR	GSTM1	ALDH3A2			MTMR6
	MMP14			PSAP	CYP24A1	ALDH3B1			PTDSS1
	KDM5A			TMEM150B	PFKFB4	ALDH3B2			FITM1
	HS3ST3B1			PREX1	ACADS	ALDH4A1			DPEP1
	CCL21			SALL2	CHST1	ALDH5A1			HSD17B2
	MIR199A2			STAB1	CHPF2	ALDH6A1			APOA5
	MYL2			ICAM2	BGN	ALDH7A1			SREBF1
	GLS2			HSP90AB1	THEM5	ALDH9A1			CERK
	FERMT1			LYPD3	HMMR	ALDOA			ACOT1
	SCUBE3			TGFBR1	NUP160	ALDOB			PEX11A
	GRIN1			MS4A7	AS3MT	ALDOC			GPS2
	PPARGC1A			CLEC14A	GALE	ALG11			TRIB3
	ADAM12			ADGRL4	UST	ALG13			TGFB1
	MIR211			SIGLEC17P	PFKFB2	ALG3			ELOVL1
	MUC1			HTRA4	AHCY	ALG8			ARSI
	AQP9			CLOCK	NUP155	ALK			PRKD2
	TAB1			MMP2	FUT3	ALKBH1			NDUFAB1
	GPC1			P2RY13	NHLRC1	ALMS1			ESYT3
	ANPEP			EP300	TPI1	ALOX12			NR2F2
	CLDN4			PRKAR2B	ARSB	ALOX12B			ACAD11
	SCRIB			SERPING1	ADH6	ALOX15			ACOT11
	EXOC4			POU2F2	GSTM5	ALOX15B			AGK
	WIPF1			SPATA13	HPSE	ALOX5			MED25
	FGF2			LILRB5	B4GALT7	ALOX5AP			RORA
	IGFBP3			GIMAP8	SLC35B2	ALPG			MED17
	FUCA1			FBN1	UGT2A3	ALPI			TM7SF2
	CXCL8			CCL7	HPGDS	ALPK3			VAPB
	HNF4A			IL22RA2	2021-03-01	ALPL			ABCD1
	ZEB2			VEGFA	SLC25A12	ALX1			CSNK2A2
	MIR16-1			P2RY8	ACSM6	ALX3			CRLS1
	FBLN2			TNNT2	CYP11B1	AMACR			ACSL4
	RB1			ICOS	UGP2	AMBP			SUMF2
	SCG2			HLA-B	CBR3	AMD1			SCAP
	ITGA3			IFIH1	ABHD14B	AMELX			SCP2
	PRSS2			GATM	B3GALT5	AMELY			CPNE7
	DDX5			LAP3	RANBP2	AMFR			MBOAT7
	HSPB2			SFRP2	IDS	AMH			CPTP
	TNFRSF12A			PPM1H	GPC4	AMHR2			ECHS1
	MIRLET7D			RASGRF2	CYP27B1	AMIGO2			ENPP6
	CCND2			GPR65	CALM1	AMMECR1			PIK3R4
	UIMC1			RNASE2	RPE	AMOT			ACOXL
	SOX5			PFDN2	PGD	AMOTL2			MED10
	RNF8			IFNK	ACAN	AMPD1			MVD
	NUAK1			VMO1	B4GALT4	AMPD2			PLA2G2D
	SOX4			MINDY2	GLB1L	AMPD3			OSBPL3
	MGLL			IFNW1	CYP2C19	AMPH			MSMO1
	PDCD6IP			GZMH	MAN2C1	AMT			PCYT2
	HOTAIR			FCGR1B	UGDH	ANAPC10			ACOT2
	CIP2A			RGL4	PODXL2	ANAPC13			ACSM3
	IRF6			PLPP7	DLD	ANAPC15			MTMR3
	ELK3			CRYBG2	DPEP2	ANAPC5			SLC25A1
	ERBIN			HIST1H2AG	SDC4	ANG			BMX
	GLRX			LAMA4	NAGLU	ANGEL1			NEU2
	HAVCR2			CD3D	CYP1B1	ANGEL2			CYP4F22
	TSC1			RFTN1	SDHD	ANGPT1			CD36
	ART1			CDH5	AAAS	ANGPT2			FABP2
	EGFL7			CREBRF	EXT1	ANGPTL2			HSD17B3
	MIR185			DCBLD1	DCXR	ANGPTL7			MTM1
	MIR517C			TIMP2	MAOB	ANK1			SMARCD3
	MCM7			FCGR3A	GNS	ANK2			GPD1
	QSOX1			IL17B	FUT6	ANK3			GDPD5
	SLC9A3R1			C1QTNF7	NR1H4	ANKLE2			ACSBG1
	MIR200C			HCP5	TPST2	ANKMY2			ARSA
	TACC3			TMEM229B	SLC26A1	ANKRD1			NR1D1
	WWOX			AKAP5	SULT2A1	ANKRD12			KLF5
	MICALL2			HEPHL1	GOT1	ANKRD17			CYP2R1
	BBC3			PSMC3	MAN2B1	ANKRD26			INPP5D
	PLAUR			ITGAM	CYP26B1	ANKRD28			PTGS1
	PTN			PALM2-AKAP2	UGT1A4	ANKRD34C			NUDT19
	EHD1			NMI	CYP4B1	ANKRD40			PLA2G4D
	CREBBP			IGF1	ENO2	ANKRD46			ADIRF
	SUFU			OASL	HK1	ANKRD6			ABCC3
	PTHLH			S100A7	GPC6	ANKRD7			LIPH
	SEMA4C			HCST	FUT2	ANKS1A			HSD11B1
	CDX2			LCP2	ACBD7	ANO3			CYP24A1
	FCN2			LDLRAD4	PDK4	ANOS1			SGPL1
	PBXIP1			NBEAL1	PFKL	ANP32A			ACADS
	MIR485			KCNMB1	FUT5	ANP32B			PIK3CD
	TRPS1			APOC1	ACAD10	ANP32E			THEM5
	GLIPR2			TM6SF1	NUP214	ANPEP			LPIN1
	IKBKG			PRKCQ	SUCLA2	ANXA1			FIG4
	CUL3			KCTD12	PGLS	ANXA10			STARD3
	ESRRB			VPREB3	NUP43	ANXA11			ALB
	FN1			CYBA	B4GALT1	ANXA13			AGPAT3
	TUG1			IL20RB	DSE	ANXA2			PNPLA4
	AXIN1			HERPUD1	GNPDA2	ANXA2P1			SPTLC1
	FZD8			CD180	LDHAL6A	ANXA2P3			MED27
	EDN1			TSHZ3	PDHX	ANXA3			PLA2G5
	EGFR			HLA-DRB1	BSG	ANXA4			MED13
	IL23A			FAM78A	ACSM4	ANXA5			MTMR8
	MIR15B			TPK1	FDXR	ANXA6			NCOA6
	IFT88			SYTL3	CYP4V2	ANXA7			RELA
	TP53BP2			KRT14	ARNT	ANXA9			DDHD2
	SMAD4			ERAP1	POM121C	AOAH			PNPLA8
	SAT1			FRZB	OGDH	AOC1			CYP17A1
	FOXN1			PLXND1	G6PD	AOC2			NEU1
	HIC1			ADAMTS9	PPP2R5D	AOC3			MED15
	NTN1			TESC	LYVE1	AOPEP			CPT1B
	ALDOB			DCHS1	SLC16A1	AOX1			MLYCD
	CCND1			HSPA2	HYAL2	AP1B1			HMGCS1
	FOXC2			IFNA2	NDST1	AP1G1			ACER3
	ZNF217			UBASH3A	SULT6B1	AP1G2			MTMR1
	MIR30D			PRL	SDHC	AP1S1			ARSB
	NKX6-1			IL21R	CHST13	AP1S2			CERS5
	MDM4			TRPC4AP	UGT2B11	AP2A2			CH25H
	TRAP1			IL4R	SULT1A3	AP2B1			ZNF638
	NTN4			HIST1H2AE	AHR	AP2M1			HPGDS
	BASP1			COL18A1	IDH2	AP2S1			ACSM6
	GAPDH			KCNAB2	UGT1A6	AP3B1			LEP
	NME1			PDE3A	PFKFB1	AP3B2			FABP9
	CAPNS1			MGAT5	CYP27A1	AP3D1			PLA2G4B
	CDKN1B			RAB20	GGCT	AP3M2			GGPS1
	KIT			CX3CL1	PFKFB3	AP3S1			CYP11B1
	ERN1			ITGAD	AKR1A1	AP3S2			SLC10A2
	TNFRSF11B			TBXAS1	CYP4F11	AP4E1			SLC27A5
	GPX7			SIGLEC7	AOC1	AP4M1			SLC25A17
	SEMA3E			GAB3	B3GAT2	AP4S1			PI4K2B
	GLO1			PCED1B-AS1	PDP2	APAF1			ENPP7
	SPP1			LILRA6	HS3ST6	APBA1			APOA2
	PCSK1			COL14A1	B3GNT2	APBA2			PLA2R1
	MYCN			CD302	GPI	APBA3			ESYT2
	EED			KCNJ8	DLAT	APBB1			EBF1
	BRMS1			HLA-DMA	SLC25A11	APBB2			GDPD1
	CTNNBIP1			CLEC12A	DSEL	APBB3			OSBPL9
	PPARG			COL6A3	ECI1	APC			STS
	SFRP4			CXORF21	VCAN	APC2			CYP27B1
	LRRC15			SULT1C2	CYP3A5	APCS			CERS1
	MYBL2			KLHDC10	HSPG2	APEH			TECR
	EZR			LRP6	MMAA	APEX1			APOA1
	PKP3			PTPN22	GSTT2	APEX2			SQLE
	ARMC8			ACVR1B	ME1	API5			ACBD4
	MTUS1			IL4	UGT1A5	APLNR			EHHADH
	LIMS1			CXCR2	SULT4A1	APLP1			GLB1L
	TEAD2			DBH	HADHA	APLP2			LPIN3
	H2AFZ			ADA2	ACADVL	APOA1			CYP2C19
	CRYAB			MRVI1	UGT1A1	APOA4			AGPAT4
	S100P			TRIM61	GAPDHS	APOA5			PTDSS2
	SPDEF			CD40LG	POR	APOB			MED11
	PDCD1			PLD4	GSTA3	APOBEC1			PLA2G2A
	NFKB1			PATL2	NUP88	APOBEC2			ECI2
	LOXL2			CTSG	GYG1	APOBEC3B			PLBD1
	BVES			GGT1	DCN	APOBEC3C			NFYC
	MALAT1			RELN	AKR1B1	APOBEC3F			DPEP2
	AKT1			FCGR2A	TALDO1	APOBEC3G			SLCO1A2
	CERS6			FCGR2C	CEMIP	APOC1			FABP12
	FHL2			UBA7	MCAT	APOC3			LTC4S
	MIR31			ACTA2	KERA	APOD			PLA2G12A
	CKS2			LPL	NUP107	APOE			CYP1B1
	XBP1			IL22	HEXB	APOF			MBOAT2
	LGALS9			SYT11	NCOA2	APOH			PLIN3
	VIM			DOCK4	CHST9	APOL1			ACOT6
	LRRFIP1			P4HA3	PPP2R1B	APOM			PLEKHA8
	STAT5A			SDC2	NNT	APOOL			GDPD3
	CRK			TNFRSF1B	PDK3	APP			PIP5K1C
	PRKAA1			ACSL5	MGST2	APPBP2			OXCT2
	ANXA2			TSHR	PHKA1	APRT			SRD5A1
	PEAK1			HMGB1	CYP7A1	AQP1			PISD
	HTRA1			GJB2	SLC26A2	AQP2			MTMR4
	TGM2			SCARF1	VDAC1	AQP3			HSD17B11
	PROX1			CCL19	PGAM2	AQP4			SUMF1
	IL18			EIF2AK1	TPMT	AQP5			PIK3R6
	MIR124-3			ZNF831	HADHB	AQP6			MFSD2A
	TLN1			LCOR	GSTA1	AQP7			NR1H4
	MIR206			BICC1	SHPK	AQP8			SRD5A3
	ARHGEF12			KLRK1	HS3ST1	AQP9			ETNK2
	PPIB			CTLA4	ACSS1	AQR			OSBP
	PPM1D			AQP1	PPP2R1A	AR			SULT2A1
	CA9			FCER2	ST3GAL2	ARAF			RAB5A
	IL1B			FCRL3	UGT2A1	ARAP1			SEC24D
	MIR506			DYSF	NUP93	ARAP2			ALOXE3
	FOXA1			ADGRF4	HS6ST2	ARC			ACSL6
	AGR2			STXBP6	SEH1L	ARCN1			CYP4B1
	PTPN6			LINC00926	PTGES3	AREG			PLA2G2E
	CCNA2			SPAG4	HS3ST5	AREL1			HSD17B4
	AJUBA			GIMAP5	ADHFE1	ARF1			THRSP
	SREBF1			MMP14	CYP2A7	ARF3			PTPMT1
	UHRF1			TIMD4	ACADL	ARF4			ACBD5
	KDM1A			CCL21	SDHB	ARF5			AGPAT1
	CUX1			RUFY4	EPHX1	ARF6			ALOX5AP
	NANOGP8			TMEM140	2021-03-02	ARFGAP2			HMGCL
	OCLN			DPP8	GPC2	ARFGAP3			TIAM2
	ZNF746			SDSL	HYAL1	ARFGEF1			CCND3
	LYN			EVI2B	CYP46A1	ARFGEF2			SLC44A2
	VTN			SCUBE3	DLST	ARFIP1			INPP4B
	MTHFD2			GSDMA	SLC16A3	ARFIP2			MOGAT3
	FAS			SAMHD1	SULT1B1	ARFRP1			NPAS2
	NT5E			ADAM12	BCAN	ARG1			LPCAT1
	CCNG2			KIR2DL4	CSGALNACT1	ARG2			SCD
	TGFB1			AQP9	GSTO1	ARHGAP1			INPP5K
	MIR9-1			CEP128	ST3GAL3	ARHGAP11A			MED22
	HMGA2			ARID5A	BPHL	ARHGAP12			ACBD7
	CCR6			ZNF80	ACY1	ARHGAP19			DGKB
	SNAI1			IL17RA	PGP	ARHGAP22			ACAD10
	HOXA13			CD163	PAOX	ARHGAP25			AGPS
	LOXL1			NFKB2	FMO1	ARHGAP26			TECRL
	COL11A1			CARMIL2	GAA	ARHGAP29			STARD3NL
	PRMT1			RASSF2	PHKG1	ARHGAP32			ADIPOQ
	NR2F2			PSMD11	HS3ST4	ARHGAP33			CARM1
	FSTL1			RENBP	GSTM3	ARHGAP35			PPT1
	DKK3			INHBC	NUP50	ARHGAP4			SEC24C
	ARRB1			SLC34A2	TKT	ARHGAP44			FDXR
	NOTCH3			TTBK2	B3GALT2	ARHGAP45			PPARGC1B
	COL5A2			FCMR	CYP2C8	ARHGAP5			MED7
	FLOT2			WIPF1	TKFC	ARHGAP6			TAZ
	EIF2AK3			NXPE4	LDHB	ARHGDIA			B3GALNT1
	COL3A1			LILRB2	CYP2J2	ARHGDIB			MTMR2
	MITF			CD48	OMD	ARHGEF1			TNF
	MIR130A			GZMA	CHP1	ARHGEF10			AGT
	JARID2			FUCA1	CYP2B6	ARHGEF11			SLC27A2
	MIR616			CXCL8	ADH7	ARHGEF12			ACACA
	CEACAM6			SLC25A45	GSTZ1	ARHGEF15			LRP2
	ISG15			ZEB2	XYLT1	ARHGEF16			ARNT
	SPOCK1			STAP1	ALDOC	ARHGEF17			ACSBG2
	PTPA			DMKN	UGT1A8	ARHGEF18			HSD17B7
	EPHB2			PLPP3	L2HGDH	ARHGEF2			THRAP3
	MIR93			FBLN2	SULT1C4	ARHGEF4			PITPNB
	PCDH9			MED13L	GCKR	ARHGEF5			ALDH3B1
	HDAC8			TNIK	MTR	ARHGEF6			HELZ2
	SPOP			CD28	B4GALT3	ARHGEF7			CPNE1
	KRT8			MAN1A1	ME2	ARHGEF9			PTEN
	TUFM			SP100	GPC3	ARID1A			LYPLA1
	G3BP1			TNFRSF12A	ME3	ARID3A			MED23
	ETV4			PSMD10	IDH3B	ARID4A			TNFAIP8L2
	SQSTM1			PSMB10	SMOX	ARID4B			SMPD3
	KAT2B			OTOA	GSTO2	ARID5A			SEC24A
	EZH2			SDR9C7	B4GALNT2	ARID5B			HSD17B12
	SKIL			BMP2K	ACAA2	ARIH1			PLD2
	KLF6			CLIP3	ACOT12	ARIH2			PRKAG2
	KCNN4			NHSL2	GOT2	ARL1			MID1IP1
	JAG1			CD200R1	HK2	ARL2			FABP1
	MAD2L2			GMPR	B3GAT3	ARL2BP			AHR
	MLLT3			SIRPG	NCOA1	ARL3			ETNPPL
	RORC			SOX5	UGT2B15	ARL4A			GPX4
	H2AFX			TGFBRAP1	CHAC2	ARL4C			CYP27A1
	TUFT1			PSMD5	PGM1	ARL4D			STARD6
	MIR300			ARHGAP18	ACOT9	ARL6IP1			PLA2G12B
	MTDH			PTPRC	SEC13	ARL6IP5			KDSR
	JUNB			PTGIS	RAE1	ARMC6			CYP4F11
	UCA1			FAM171B	PDPR	ARMC8			CERS2
	SPARC			ACSS3	CYP4A11	ARMCX2			DGAT1
	EPHA2			ADAMTS10	MGST3	ARMCX4			PLEKHA5
	IGFBP7			CD300LF	PGAM1	ARMCX6			PIK3R1
	MYB			CCSER1	CYP26A1	ARNT			PRKAA2
	GRHL2			CD7	ADH1C	ARNT2			HMGCR
	CAVIN1			C5ORF56	HAS2	ARNTL			CERS4
	ETV1			P2RX7	FUT9	ARPC1B			ECI1
	TBK1			PLEK	STAB2	ARPC2			PLA2G4E
	RAB43			RCAN2	CHST15	ARPC3			MED18
	SMAD2			FCGR1CP	SLC16A8	ARPC4			MTMR10
	HBEGF			MMP25	GSTA5	ARPC5			ACOT4
	CREB1			GLRX	NAT2	ARPP19			MMAA
	PRDX1			HAVCR2	OGN	ARR3			SLC44A3
	MIR124-2			P2RY10	SDHA	ARRB2			ME1
	CCN1			TIFAB	UGT2B10	ARSA			PIP4K2B
	COL4A1			TNFSF8	SLC35D2	ARSB			NEU3
	ST6GAL1			ETV7	PFKP	ARSD			HADHA
	ABCB1			TRIR	CYP2F1	ARSE			HSD3B1
	FBXW7			HLA-DQB1	CHST14	ARSF			ACADVL
	ILK			GPR18	GLB1	ART1			ALDH3B2
	WNT11			CPVL	SULT1E1	ART3			SEC23A
	CD36			EDNRB	HPSE2	ART4			GPD2
	SCIN			CCNT1	G6PC2	ARTN			VAPA
	CRMP1			LHFPL6	CYP3A7	ARVCF			ARSJ
	KIF5B			UBE2L6	CYP21A2	ASAH1			HTD2
	UHRF2			PARP9	ACSS2	ASAP2			ALPI
	XRN2			PDE1A	PPP2CB	ASB1			LIPI
	GH1			S1PR1	HAS1	ASB4			SLC25A20
	EIF5A2			XKR8	GSTT2B	ASB9			DEGS1
	MIR135A1			SSC5D	CYP4A22	ASCC2			PLEKHA2
	BHLHE40			GPC5	UGT1A9	ASCC3			PPP1CC
	GLS			SBSN	G6PC	ASCL1			PIK3R5
	KDR			P2RY11	NUP37	ASCL2			PON2
	CTNND1			KCNH2	NUP153	ASF1A			FDFT1
	ADM			GIPC3	ABHD10	ASGR1			PLB1
	TDGF1			AZGP1	NUP62	ASGR2			ALOX12B
	RDX			PRAM1	HK3	ASH2L			CPT1A
	COPA			RNASE7	ACY3	ASIC1			PMVK
	LIMA1			IFNGR2	NDST4	ASIC2			AKR1B1
	RGCC			EDA2R	CD44	ASIC3			PTGDS
	SMAD7			SAMD9L	MAN2B2	ASIP			MED12
	KLK6			CNR2	B3GAT1	ASL			CEBPB
	PDGFRB			NFATC2	AOC3	ASMT			SCD5
	BRCA1			SLAMF1	ESD	ASMTL			PNPLA6
	KLF5			BFSP2	UBA52	ASNS			MCAT
	VANGL1			FLT4	RPS27A	ASPA			HEXB
	IL11			CNTF	MCEE	ASPH			GLA
	EPHB3			PANX1	TPST1	ASPHD1			NCOA2
	PEG10			MILR1	CNDP2	ASS1			ARV1
	MXRA5			IL4I1	CYP4F2	ASTN1			CAV1
	ITGAV			CEACAM4		ASTN2			NCOA3
	SDC1			SELENBP1		ASXL1			ALOX5
	HDAC9			CD58		ASXL3			PNPLA3
	CCL20			HSPA1A		ATAD2B			SAR1B
	RPL22L1			SMIM1		ATF1			GPD1L
	ZEB1			PSME2		ATF2			HMGCLL1
	SOCS3			GRAP		ATF3			CBR1
	ESR2			ADORA2A		ATF4			WNT10B
	MIR590			TMEM200A		ATF5			CYP7A1
	TBX3			PVRIG		ATF6			ACSL3
	PDGFD			IFIT2		ATF6B			ELOVL4
	GSK3B			IFNGR1		ATF7			DGAT2
	PADI4			ACTN1		ATG12			HADHB
	LUM			KMO		ATG13			OSBPL8
	MAPK8			ZMYND15		ATG14			MED6
	SNTB1			NCF4		ATG2A			PITPNM3
	NFIC			GLIPR2		ATG4A			HSD3B2
	ABCC3			BATF		ATG4B			MED30
	LATS1			MBNL3		ATG5			ACER1
	FOXM1			TLR3		ATG9A			HSD17B14
	F2R			PRTG		ATIC			TNFAIP8L1
	AURKA			PLEK2		ATM			HSD17B1
	SOD2			RTP5		ATMIN			CEBPA
	MSN			RAB37		ATN1			ARSD
	MIRLET7G			NLRP12		ATOX1			ABCB11
	TYMS			PABPC5		ATP10A			ASAH2
	COL5A3			FN1		ATP10B			FAM120B
	PAX2			GBP4		ATP10D			SPHK1
	MIR222			CRISPLD2		ATP11A			MAPKAPK2
	EIF2S1			CCDC170		ATP11B			PTGES3
	MIR218-2			MS4A2		ATP12A			UBE2I
	LAMA3			RHOJ		ATP13A3			PIP5K1B
	TXN2			SBNO1		ATP1A1			ACADL
	UCP2			CTSW		ATP1A2			ABHD3
	BTBD7			WNT2		ATP1B1			IDI1
	BGN			GBP1		ATP1B2			MTMR9
	ZEB2-AS1			ARHGAP45		ATP1B3			CYP46A1
	TFDP3			CHAC1		ATP2A1			LCLAT1
	HDAC5			BHLHA15		ATP2A2			PTPN13
	FOXC1			HMSD		ATP2A3			LPGAT1
	GAS1			ARHGAP25		ATP2B1			MED20
	MMP3			EGFR		ATP2B2			LBR
	EIF5A			TXK		ATP2B3			PNPLA7
	MIR199A1			APOC2		ATP2B4			SMPD4
	EPCAM			IL23A		ATP2C1			OLAH
	SMURF2			C15ORF48		ATP2C2			SGMS1
	ECT2			PPP1R16B		ATP4A			SIN3A
	ST8SIA1			ICK		ATP4B			PIKFYVE
	KLF17			PIK3CG		ATP5F1A			RAB14
	MYLK			SPRR2D		ATP5F1B			CHPT1
	CBY1			ITGBL1		ATP5F1C			PIK3CB
	ITCH			GPR25		ATP5F1D			OSBPL6
	HTN1			HIC1		ATP5MC1			SBF2
	DLX2			CLIC2		ATP5MC2			MED9
	MEST			MNDA		ATP5MC3			CSNK1G2
	SATB2			FCRLA		ATP5ME			CIDEA
	MIR186			CD68		ATP5MF			CYP2C8
	MFAP5			NKG7		ATP5MG			PHYH
	CYB5R1			HSPA6		ATP5MPL			PTGR2
	PRKCE			GPR84		ATP5PB			CHD9
	FAP			CCR4		ATP5PD			GM2A
	RELA			JMY		ATP5PF			FADS2
	MIR26A2			STRIP2		ATP5PO			CYP2J2
	CTSL			UBR1		ATP6AP1			NR1H3
	PAG1			ARHGEF15		ATP6AP2			HSD17B13
	HGF			MSR1		ATP6V0A1			FA2H
	MAPK1			LAIR2		ATP6V0A2			CBR4
	GEM			DOK3		ATP6V0B			PLIN2
	MICA			HLA-DPA1		ATP6V0C			ELOVL7
	OLA1			FCGR1A		ATP6V0D1			MTMR14
	ALK			PADI2		ATP6V0E1			ELOVL2
	ACTG2			ST3GAL5		ATP6V0E2			SMPD2
	TRIM33			KLHL6		ATP6V1A			STARD7
	MIR326			CALR		ATP6V1B1			TBL1XR1
	HPSE			CLEC4M		ATP6V1B2			LGMN
	KRAS			KLRC3		ATP6V1C1			PIK3C2G
	COMP			NAALADL1		ATP6V1D			CPNE3
	MAGEC2			ARL6IP5		ATP6V1E1			SMPD1
	MIR106B			F13A1		ATP6V1F			ALAS1
	ERF			FCGBP		ATP6V1G1			NEU4
	FSTL3			SCARF2		ATP6V1G2			ACSF3
	MIR129-1			KIT		ATP6V1H			ACAA2
	LEP			ERN1		ATP7A			ACOT12
	PCMT1			TNFRSF11B		ATP7B			ACAT2
	MIR302A			AGAP2		ATP8A1			ACAA1
	BMP1			COL15A1		ATP8A2			PLEKHA4
	FBLN1			RECK		ATP8B1			ABHD4
	COL12A1			AVPR1A		ATP8B3			PIP4K2A
	TCF4			SHE		ATP9A			FADS1
	STAT5B			SFMBT2		ATP9B			ALOX12
	HDAC1			MYEF2		ATPAF2			NCOA1
	ELL3			TPSG1		ATR			PLEKHA1
	CD14			CAMK1		ATRN			NFYA
	SERPINE1			MAP4K1		ATRNL1			AWAT1
	AXIN2			KIR3DL1		ATRX			SLC44A5
	GSN			GFI1		ATXN1			SBF1
	NLRP3			PTGER2		ATXN10			GLIPR1
	TRIM37			CD2		ATXN2			GK
	DAB2			HECW2		ATXN2L			LSS
	PRRX1			ST8SIA4		ATXN3			TNFRSF21
	PDGFB			FGR		ATXN7			HACL1
	MMP13			MYO7A		ATXN7L1			HSD3B7
	BRAF			VWF		ATXN7L3B			HAO2
	FHL1			VSTM4		AUH			ACOT9
	NANOS3			NLRC4		AURKA			STARD10
	PAK5			PSMD6		AURKB			RUFY1
	CPS1-IT1			KRT16		AURKC			CYP4A11
	ECM2			LILRA1		AUTS2			BDH2
	MIR381			GHRL		AVIL			AKR1C3
	RAB22A			CD247		AVL9			CCNC
	KRT18			ADAM28		AVP			LHB
	COLGALT1			LRRC15		AVPR1A			SC5D
	PRSS8			SYNDIG1		AVPR1B			SREBF2
	HSPA4			CD80		AVPR2			GBA
	TIMELESS			ARHGEF6		AXIN1			ACOT8
	FOXO4			PKP3		AXL			ARSK
	THBS1			TRPV3		AZGP1			CIDEC
	HOXA10			TUBB6		AZIN1			SRD5A2
	TERT			IFNA21		AZU1			TSPO
	CLK2			MEI1		B2M			SAMD8
	FBN2			LTA		B3GALNT1			ELOVL5
	TET1			LIMS1		B3GALT2			CDIPT
	PRKCI			MEOX2		B3GALT4			SGMS2
	KCNH1			CPNE5		B3GALT5			PI4KB
	PAK1			FNIP2		B3GAT2			ASAH1
	TIMP3			MS4A4A		B3GAT3			DGAT2L6
	SDC4			ETV3		B3GNT3			AGMO
	ITGB4			HMCN1		B3GNTL1			G0S2
	LIN28A			TRAT1		B4GALNT1			FASN
	LAMA2			IFIT3		B4GALT1			ESRRA
	TNC			PDCD1		B4GALT2			AGPAT2
	CRKL			GPR132		B4GALT3			OSBPL10
	MIRLET7A1			LOXL2		B4GALT4			PITPNM1
	MAPK14			PSMD13		B4GALT5			ACHE
	THY1			CCL3L1		B4GALT6			ARSF
	CDKL2			IL18RAP		B4GAT1			MED24
	CYP1B1			VPS37D		B9D1			HPGD
	HOXB7			SERPINA1		BAAT			KPNB1
	MIR454			XBP1		BABAM2			PCYT1A
	DLX4			LGALS9		BACH1			PTGES2
	ANG			VIM		BAD			CRAT
	NR2C2			STAT5A		BAG1			GLB1
	MET			CD93		BAG2			PECR
	HSF1			CDH20		BAG5			NSDHL
	MIR429			TAGAP		BAG6			CYP21A2
	PROM1			PPP1R9A		BAGE			NCOR1
	SIAH2			PEAK1		BAHD1			ACOX1
	JUN			RIF1		BAIAP2			TXNRD1
	HNRNPAB			INMT		BAIAP3			CYP4A22
	SNW1			LST1		BAK1			UGT1A9
	BATF2			FCRL5		BAMBI			PLA2G6
	SKP2			IL3RA		BANF1			CEBPD
	CTSZ			GNLY		BAP1			INPPL1
	BCL2			TGM2		BARD1			PLA2G15
	GLI1			LCN10		BARX2			NCOR2
	RAC1			HLA-G		BASP1			FDPS
	YPEL3			IL18		BATF			MCEE
	IL27			IL7		BAX			LTA4H
	ROCK1			PTPRJ		BAZ1A			ACER2
	FBXO11			SIGLEC12		BAZ1B			ELOVL6
	TBX2			TTC21B		BAZ2A			CYP4F2
	DKK1			CPXM1		BAZ2B
	VCP			TLR7		BBC3
	BRD4			P2RX1		BBOX1
	MIR200B			PNLIPRP3		BBS4
	YY1			TSPAN11		BBS9
	ESR1			LAD1		BBX
	SALL4			FMNL3		BCAM
	LGALS1			IL1B		BCAP29
	GREM1			TNFAIP6		BCAP31
	TP53BP1			CXCR3		BCAR3
	WWTR1			CLEC9A		BCAS1
	HDAC6			TNFRSF10A		BCAS2
	PTP4A3			ZFPM2		BCAT1
	MIR96			DPEP1		BCAT2
	MMP19			PTPN6		BCHE
	SLIT2			PTH1R		BCKDHA
	VHL			RASSF5		BCKDHB
	ENO2			CSF3		BCKDK
	FLT1			JCAD		BCL10
	NEAT1			GZMM		BCL11A
	DNMT1			FKBP11		BCL2
	GOLGA2			TMEM106A		BCL2A1
	NRP2			CTSS		BCL2L1
	MIR33A			ISG20		BCL2L11
	SGCD			OLFML1		BCL2L2
	S100A8			FAM49A		BCL6
	INPP4B			PIK3CD-AS1		BCL7A
	PARD3			LYN		BCL7B
	CD24			PLCB4		BCL9
	MEG3			GJD3		BCLAF1
	BMP2			GPR82		BCLAF3
	CCR2			FAS		BCR
	CXCL1			NT5E		BCRP3
	CLDN1			TESPA1		BCS1L
	EPS8			CELF2		BDH1
	GEMIN2			COL6A1		BDKRB1
	ZEB1-AS1			CDH3		BDKRB2
	LMNB1			CD160		BDNF
	CCL25			TGFB1		BEAN1
	TRIM16			RHOD		BECN1
	MIR128-1			C16ORF54		BEST1
	WNT3A			CCR6		BET1
	MIR345			TAOK1		BEX4
	CXCL16			COL11A1		BFSP1
	RASSF1			CREB3L1		BFSP2
	FGFR1			KLRG1		BGN
	TFPI2			FSTL1		BHLHE40
	CFTR			OSMR		BHMT
	NF1			SPRR1B		BICC1
	MUC16			FAM168A		BICD1
	MIR27A			ARRB1		BICD2
	TLE1			COL5A2		BICDL1
	APLP1			ADRM1		BICRAL
	NUMB			PPM1M		BID
	WASF3			CIITA		BIK
	PLS3			EIF2AK3		BIN1
	ADAM10			COL3A1		BIRC2
	ADIPOQ			BDKRB2		BIRC3
	RBFOX3			MITF		BIRC5
	SENP2			NME8		BLCAP
	MAP2K1			PSMD14		BLK
	TGFB2			PSMC4		BLM
	MIR30E			TNFSF14		BLMH
	MDK			ADAMTS12		BLNK
	PTK2			TMC8		BLVRA
	CDK5			ISG15		BLVRB
	SOX3			THEMIS2		BLZF1
	BSG			FAM25A		BMERB1
	KHDRBS1			KCNA3		BMI1
	LINC01186			IL13RA1		BMP1
	HDGF			VAV1		BMP10
	EGLN3			SAMD3		BMP2
	TAZ			VEGFB		BMP2K
	YBX1			TAP2		BMP3
	ITGA6			QPRT		BMP4
	TNF			ANO6		BMP5
	GPR32			ADRA2A		BMP6
	RGS4			CYBB		BMP7
	MCAM			KRT78		BMP8A
	COL1A2			TAPBPL		BMPR1A
	EGR1			PRELP		BMPR1B
	LETMD1			CD1E		BMPR2
	MIR218-1			CD34		BMS1
	COL5A1			ACVR2A		BMX
	CCL2			KCNN4		BNC1
	MIR573			MAP3K2		BNIP1
	NUBPL			RAPGEF2		BNIP2
	GNA13			HAPLN3		BNIP3
	EPHA8			LAT2		BNIP3L
	ROR1			EFTUD2		BOLA2
	SPRY1			CSF2RA		BORCS8-MEF2B
	SPRY2			MRPS21		BPGM
	NPTN-IT1			KRT6A		BPHL
	YWHAZ			CD209		BPI
	PTEN			SPRR1A		BPTF
	CRP			CD8A		BRAP
	CDH13			SPARC		BRCA1
	KMT5A			ENPP2		BRCA2
	EDIL3			RAB33A		BRD1
	MIR646			CSGALNACT2		BRD2
	ITGB1			TMEM79		BRD3
	CRIM1			ACOXL		BRD4
	NANOG			ZNF185		BRD8
	TNFAIP8L2			OAS3		BRDT
	PCGF2			PIK3AP1		BRF1
	MDM2			DENND2A		BRINP1
	NTRK2			STAT4		BRINP2
	TGFBR2			IFNL2		BRINP3
	PLAC8			OAS2		BRMS1
	GDF15			SIGLEC9		BRPF1
	NFKBIA			JSRP1		BRS3
	RUNX1			CAVIN1		BRSK2
	CD63			IDO2		BRWD1
	GOLPH3			ZKSCAN1		BSCL2
	SCEL			PLA2G2D		BSG
	AHR			FGF7		BSN
	IDH2			F5		BST1
	MAP3K4			OSCAR		BST2
	VSIG4			CREB1		BTAF1
	VASH2			PARM1		BTBD2
	SPRR2A			IL36G		BTBD3
	INHBA			PDGFRA		BTBD9
	FAM3C			ABCA6		BTC
	NOTCH4			COL4A1		BTD
	MIR150			ACVRL1		BTF3
	BOP1			GCSAM		BTG1
	ESRP2			ST6GAL1		BTG2
	FZD2			TUBA4A		BTG3
	RNH1			SIGLEC1		BTK
	LGALS3			ABCB1		BTN1A1
	AMHR2			SCIMP		BTN2A1
	MIR331			ANKRD36BP1		BTN3A1
	PDE4A			IFI27		BTN3A2
	PIK3R1			CALHM5		BTN3A3
	CAPZA1			ANXA6		BTNL3
	PRKAA2			MYO9A		BTRC
	EIF4G1			EMILIN1		BUB1
	TJP1			CD36		BUB1B
	GPI			MSRB3		BUB3
	ZMYND8			SELPLG		BUD23
	FSCN2			MCEMP1		BUD31
	TLR4			NCCRP1		BYSL
	HIPK2			CACNA2D2		BZW1
	TNFSF11			CSF1R		C11ORF52
	RASA1			ICOSLG		C11ORF58
	VCAN			LILRA4		C11ORF80
	IRS1			PRG2		C12ORF29
	CCR7			TMIGD2		C15ORF39
	SOX17			KDR		C17ORF75
	NODAL			FGL2		C18ORF25
	CAP2			SRGN		C19ORF57
	CYP3A5			PLPP4		C1D
	CXCL6			INHBB		C1QB
	PROKR1			CXCR6		C1QBP
	PMP22			CCL16		C1QL1
	THBD			VTCN1		C1R
	MIR34C			PPFIA2		C1S
	TIAM1			IL22RA1		C1ORF105
	LINC00261			THSD7A		C1ORF21
	FSCN1			RARRES2		C1ORF216
	SLC39A6			LPAR4		C1ORF61
	CCL3			PDGFRB		C1ORF68
	KL			APOBR		C2
	AKTIP			PNMA2		C20ORF194
	BDNF			PLAC9		C22ORF24
	PPP1R8			ICAM3		C22ORF31
	HSP90AA1			IL11		C2CD2
	AGTR1			IDO1		C2CD2L
	DYRK2			COL6A6		C2CD3
	MIR204			PSMD2		C2CD5
	TRIM28			ITGAX		C2ORF27A
	SRC			APOBEC3D		C2ORF72
	AR			RAET1G		C3AR1
	MIR802			CCL20		C4BPA
	P3H1			PDCD1LG2		C4BPB
	F2			LAX1		C5
	FST			CTTNBP2		C5ORF15
	MIR181B1			ZBP1		C5ORF22
	ENG			ZEB1		C5ORF30
	JAG2			KLHL23		C6
	EFEMP1			C1ORF162		C6ORF120
	SEMA7A			IL10		C6ORF47
	MIR153-2			RAB8B		C6ORF62
	HIP1			SPIB		C7
	CXCL5			CFP		C8A
	FOXR2			INPP5D		C8B
	ETS2			KIAA1549		C8G
	GADD45B			SYNE1		C9
	MIR145			KLK9		C9ORF16
	CNTN1			TRIM21		CA1
	NCL			GMFG		CA11
	LOX			MIR155HG		CA12
	ITGA5			LUM		CA2
	DCN			CHRD		CA3
	MST1R			SNTB1		CA4
	NEUROG3			C1ORF127		CA5A
	ITGB5			POMK		CA5B
	CD59			LATS1		CA6
	AQP5			F2R		CA7
	CEBPB			HSD11B1		CA9
	SEMA4A			CCL23		CABIN1
	ERG			SLC29A3		CABP1
	CEMIP			SERINC5		CACNA1A
	YWHAG			BCL2L14		CACNA1B
	ETS1			CYSLTR1		CACNA1C
	IL17RD			CXORF65		CACNA1D
	JAK3			ADAMTS14		CACNA1E
	CRLF1			COL5A3		CACNA1F
	S100A9			ADGRA2		CACNA1G
	MGP			LIG3		CACNA1H
	CAV1			UCP2		CACNA1S
	NCOA3			EMCN		CACNA2D1
	HMOX1			BGN		CACNA2D2
	SRI			FOXP3		CACNB1
	MUC2			CMPK2		CACNB2
	PKD1			ADAMTS16		CACNB3
	SHH			ABCA9		CACNB4
	BCL6			SLC17A9		CACNG1
	SON			MYO1F		CACNG3
	ACVR1			MMP3		CACTIN
	PRKCA			KRT6C		CACYBP
	PLOD2			IGDCC4		CAD
	CYTOR			GMIP		CADM1
	FURIN			EPCAM		CADM3
	BMI1			CACNA2D4		CADM4
	HOXB9			HDC		CADPS
	MIR153-1			CD72		CALB1
	SERPINH1			NCR3		CALB2
	RBM8A			CEACAM21		CALCA
	CBR1			PECAM1		CALCB
	MIR26B			ISLR		CALCOCO1
	MIR101-1			CRLF2		CALCOCO2
	PEBP4			LRMP		CALCR
	MEF2D			CCDC141		CALCRL
	ZFYVE9			TRAF1		CALD1
	TGFB3			CCL1		CALM1
	KRT19			PLCL1		CALM2
	MAPK7			IL2RB		CALM3
	MAGED1			MED13		CALML3
	CDK3			ZNF671		CALR
	MYD88			FAP		CALU
	MBD3			C4A		CAMK1
	EDNRA			MS4A14		CAMK1G
	PITPNM3			HSPA1B		CAMK2A
	PGRMC1			GUCY1A2		CAMK2B
	ASCL1			HCK		CAMK2G
	TXN			CTSL		CAMK4
	CDK14			PAG1		CAMKK2
	USP17L9P			PLVAP		CAMLG
	CEBPA			ABCA8		CAMP
	NR4A1			C3AR1		CAMSAP1
	STK33			HGF		CAMSAP2
	CARD10			PGM5		CAMTA1
	AGER			ATP8B4		CAMTA2
	NDRG1			ROBO4		CAND1
	HS6ST2			HFE		CAND2
	SPHK1			SH2D5		CANX
	MTA1			SMPDL3B		CAP1
	ATM			SLC24A4		CAP2
	BTRC			ARSB		CAPG
	EFNB2			COLGALT2		CAPN1
	UCHL3			ITGB7		CAPN11
	NID2			PSMC6		CAPN15
	REPIN1			PDE1B		CAPN2
	MIR30C1			TMEM47		CAPN3
	RHOB			DSG1		CAPN5
	ZFP36			PRSS27		CAPN6
	CD151			BHLHE41		CAPN7
	CEACAM1			HPGDS		CAPN9
	MTA3			FSTL3		CAPNS1
	KRT7			LEP		CAPRIN1
	TGFBI			NECTIN2		CAPZA1
	MIR23A			OVOL1		CAPZA2
	DNMT3B			CCRL2		CAPZB
	SFTPC			KIR2DL3		CARD10
	TGFBR3			SIGLEC8		CARD8
	CALD1			IFI35		CARM1
	LGR5			TMEM119		CARS
	CCL5			PREX2		CARTPT
	TXNIP			RSAD2		CASC3
	CEACAM5			CMA1		CASK
	WNT6			COL12A1		CASP1
	SIN3A			HLA-DQB2		CASP10
	WNT5A			PCDH17		CASP17P
	MIR30A			DLC1		CASP2
	MICAL2			DOK1		CASP3
	NTRK3			SLC10A2		CASP4
	TNFSF15			SPN		CASP5
	TGFA			TNFRSF10B		CASP6
	HMGB3			BTN2A2		CASP7
	CCR5			CILP		CASP8
	TFCP2			LPXN		CASP9
	CDH2			OLFML3		CASQ2
	EGF			CD14		CASR
	MIR487B			BLK		CAST
	CSF2			VGLL3		CAT
	MAPK3			SERPINE1		CATR1
	PIM2			PSMC5		CAV1
	LEFTY1			ZNF215		CAV2
	HAND1			AKAP12		CAV3
	MGAT3			FCER1A		CAVIN1
	BAG3			GIT2		CBARP
	ESRP1			NLRP3		CBFA2T2
	MIR100			PTPN7		CBFA2T3
	EHD2			EPS8L1		CBFB
	MIR203A			CR1L		CBL
	MIR655			DHRS1		CBLB
	NOTCH1			EBF1		CBLIF
	FERMT2			CD79A		CBLN1
	COL1A1			ADAMTSL2		CBR1
	NR1H3			CLIC3		CBR3
	EPAS1			DAB2		CBR4
	LAMA5			PRRX1		CBS
	GSK3A			CD3E		CBX1
	CUL4A			PDGFB		CBX2
	ANXA5			AIF1		CBX3
	ID1			C9ORF139		CBX4
	IMP3			ENPP4		CBX5
	ELK1			SPNS3		CBX6
	MIR875			GPR174		CBX7
	STK11			DENND6B		CBY1
	POU5F1			PAK5		CCDC106
	CD274			CHRDL1		CCDC130
	CCN2			FAT4		CCDC144A
	MTOR			THEMIS		CCDC181
	VSNL1			IGFLR1		CCDC22
	HRG			AMH		CCDC28A
	HOXA9			HHLA2		CCDC57
	TEAD1			KLRD1		CCDC6
	LEF1			NCF1C		CCDC69
	CSK			KCND2		CCDC85B
	TBL1XR1			ECM2		CCDC86
	BMP6			ENPP3		CCDC88C
	MIR125B1			FGF14		CCDC9
	HSPB1			PDE6G		CCDC93
	COL7A1			IL13		CCHCR1
	FOXO3			PAFAH1B2		CCIN
	TAGLN			TNFRSF6B		CCK
	PIN1			RBP5		CCKAR
	HOXD9			RNF180		CCKBR
	GPC3			DOK6		CCL1
	VEGFC			MFAP3		CCL11
	ITGA2			TNFSF18		CCL13
	NES			TVP23A		CCL16
	EPB41L3			MRPL27		CCL17
	YAP1			TBC1D10C		CCL18
	GATA3			RFXAP		CCL19
	KDM4B			SPOCK2		CCL2
	CDKN2A			FCAR		CCL20
	ONECUT2			HSPA4		CCL21
	MIR30C2			TCIRG1		CCL22
	COL8A1			LEPR		CCL23
	IL6R			SH2D1A		CCL25
	KRT17			THBS1		CCL27
	EEF1D			GPIHBP1		CCL3
	BIRC5			TLR5		CCL4
	CXCL12			IL5		CCL5
	TNS1			GPSM3		CCL7
	RBP2			RFXANK		CCL8
	TYRO3			FMNL1		CCN1
	NPPA			ARHGAP9		CCN2
	IL17A			DENND1C		CCN3
	GADD45A			OAS1		CCN4
	FOSL1			GPR55		CCN5
	NCSTN			C7		CCN6
	MMD			EBF2		CCNA1
	IL15			RNF222		CCNA2
	GOLM1			NFYC		CCNB1
	SHC1			IL10RB		CCNB2
	DAB2IP			TMEM233		CCNC
	FOXK2			LHFPL2		CCND1
	EPO			RASGRP3		CCND2
	TRPM8			TIMP3		CCND3
	CTNNB1			DPEP2		CCNE1
	VGLL4			KITLG		CCNE2
	STIM2			AMPH		CCNF
	HK2			IGSF6		CCNG1
	DAPK1			SLIRP		CCNG2
	LCN2			ITGB2		CCNH
	CAPG			LAMA2		CCNI
	ZFAS1			SNAI3		CCNO
	STAT3			CRTAM		CCNT1
	PDLIM4			LTC4S		CCNT2
	MIR301A			PTGFR		CCP110
	TNXB			CASP5		CCPG1
	COL4A2			UBXN11		CCR1
	PHLDA1			THY1		CCR2
	PSME3			FAM13C		CCR3
	S100A2			CYP1B1		CCR4
	GLIPR1			SLC8A1		CCR5
	PBX3			PLIN3		CCR6
	KDM6A			LCP1		CCR7
	C5AR1			MET		CCR8
	ZNF143			COLEC12		CCR9
	TRIM62			FGD3		CCRL2
	PARD6A			CD22		CCS
	CTBP1			PARVG		CCSER2
	AJAP1			BTK		CCT2
	LIF			CCR1		CCT3
	TPM2			DSC1		CCT4
	MIR30B			PROM1		CCT5
	FOXP2			IL2		CCT6A
	KLF8			FAM107A		CCT6B
	NOG			C1ORF54		CCT7
	FLNA			MAOB		CCT8
	P2RY2			DERL3		CD101
	STK26			BATF2		CD14
	EHMT2			CRCT1		CD151
	IDH1			CTSZ		CD160
	BRF2			GNS		CD163
	CXCR4			SVOPL		CD164
	GIPC2			ZCCHC24		CD180
	GMNN			ENPEP		CD19
	E2F1			BEX5		CD1A
	PTP4A2			PRF1		CD1B
	ELF5			GNG2		CD1C
	MIR23B			PIK3R6		CD1D
	CLU			RUNX1T1		CD1E
	EFEMP2			VENTX		CD2
	TP53			IL1R1		CD200
	RMST			FCRL4		CD22
	TWIST1			FAM155A		CD226
	HAS2			RAET1E		CD24
	SIRT3			NTRK1		CD247
	MIR101-2			ESAM		CD27
	SOX9			IL27		CD28
	CCL18			C1QA		CD2AP
	CPEB1			UBXN1		CD2BP2
	MIR124-2HG			FHL5		CD300A
	OSM			PLCL2		CD300C
	SUZ12			LDB2		CD33
	SLIT3			SIRPB1		CD34
	RHOG			CLEC4E		CD36
	MIR494			CHRNA6		CD37
	MAP3K7			ERP27		CD38
	SFRP1			CXCL11		CD3D
	FASN			GREM1		CD3E
	TM4SF5			GZMK		CD3G
	ESRRA			SEC24D		CD4
	SIX1			NLRC5		CD40
	HIF1A			ALOXE3		CD40LG
	CDH1			ANKRD36BP2		CD44
	GJA1			RIMKLA		CD46
	MIR141			RTN1		CD47
	PITPNM1			STARD13		CD48
	TLE4			TLR1		CD5
	MUC4			BANK1		CD52
	MIR26A1			PSMB8		CD53
	CEP164			IFNE		CD55
	POGLUT1			SLIT2		CD58
	MIR193A			DUSP4		CD59
	KDM6B			S100B		CD5L
	MCRIP1			IRF4		CD6
	IRGM			CLEC4A		CD63
	PDPN			SLAMF7		CD68
	MMP9			RAI2		CD69
	HPGD			PTPRO		CD7
	POSTN			ALOX5AP		CD70
	CCNDBP1			CSF1		CD72
	LASP1			FLT1		CD74
	RUNX3			CDC42SE2		CD79A
	ROR2			HLA-A		CD79B
	SERPINE2			HTRA3		CD80
	CALU			PTAFR		CD81
	FGF9			GJA5		CD82
	RGS3			HEYL		CD83
	ADAM17			KLRC2		CD84
	MIR134			SGCD		CD86
	MMP1			RGS13		CD8A
	OXTR			SECTM1		CD9
	CCL22			S100A8		CD93
	SMAD9			GPC6		CD96
	MIR148A			TBCEL		CD99
	ATXN1			BMP2		CDA
	PARP1			CCR2		CDC123
	SIAH1			CXCL1		CDC14A
	MIR136			HSPA12B		CDC14B
	ID2			EPS8		CDC16
	IL6			CD207		CDC20
	TNFSF10			HLA-DRA		CDC23
	TBX20			TNFRSF13C		CDC25A
	IGFBP4			JCHAIN		CDC25B
	NFIL3			CCL25		CDC25C
	NEDD4L			BEND5		CDC27
	FOXJ2			LIPA		CDC34
	GJB1			SKAP1		CDC37
	AREG			CXCL16		CDC40
	MZF1			CHIT1		CDC42
	GATA1			CD70		CDC42BPA
	ERBB2			BTN3A1		CDC42EP1
	ROCK2			CCDC69		CDC42EP2
	IRS2			MRC1		CDC42EP3
	CD44			C11ORF21		CDC42EP4
	ITGB3			ZNF835		CDC45
	LINC-ROR			CCDC80		CDC5L
	MIR373			RNASE6		CDC6
	TP73			BST2		CDC7
	PCOLCE2			RIN1		CDH1
	BCL2L1			STRN		CDH11
	THBS2			EIF2AK4		CDH12
	CXCL13			IL21		CDH13
	FGFR2			SPON1		CDH15
	TWIST2			INHBE		CDH16
	KAT8			SLC39A2		CDH17
	FZD7			ACKR3		CDH18
	USP22			ULBP2		CDH19
	TCF7			UNC5C		CDH2
	TNFRSF11A			CYFIP2		CDH22
	BIRC2			IL18R1		CDH3
	TIMP1			CYSLTR2		CDH4
	ELAVL1			GIMAP2		CDH5
	MIR132			FCGR3B		CDH6
				TGFB2		CDH8
				PAM16		CDHR1
				RAD23B		CDIPT
				ANKRD55		CDK1
				TNFSF9		CDK10
				HLA-E		CDK11B
				IL23R		CDK12
				RIN3		CDK13
				PDIA2		CDK14
				VASH1		CDK16
				AP3B1		CDK17
				KIR2DS4		CDK18
				ACE		CDK19
				TSLP		CDK2
				ARRB2		CDK20
				CHN1		CDK2AP1
				ANGPTL2		CDK2AP2
				RFX5		CDK3
				TNF		CDK4
				SLC7A7		CDK5
				CLEC3B		CDK5R1
				SULF1		CDK5R2
				CLEC6A		CDK6
				IL5RA		CDK7
				GPR183		CDK8
				RAB39A		CDK9
				ASXL2		CDKL1
				ARHGDIB		CDKL2
				TCEAL7		CDKL5
				FNDC1		CDKN1A
				ADAMTS4		CDKN1B
				COL1A2		CDKN1C
				C6ORF132		CDKN2A
				COL5A1		CDKN2B
				TNFRSF8		CDKN2C
				HLA-DQA1		CDKN2D
				CD300C		CDKN3
				RNASE1		CDO1
				CLTB		CDON
				SARDH		CDR1
				CD3G		CDR2
				CCL2		CDR2L
				APOBEC3A		CDRT1
				ABI3		CDS1
				ITM2A		CDS2
				LYVE1		CDSN
				IRF7		CDT1
				ITGA2B		CDV3
				ALDH3B1		CDX1
				LIME1		CDX2
				CORIN		CDYL
				PDGFC		CEACAM1
				ROR1		CEACAM3
				MYO1G		CEACAM4
				RC3H2		CEACAM5
				GJA4		CEACAM6
				TLR10		CEACAM7
				SPRY1		CEACAM8
				CTSO		CEBPA
				DPT		CEBPB
				ALPK2		CEBPD
				PLXDC1		CEBPE
				LTBP2		CEBPG
				GNG7		CEBPZ
				GPR141		CEL
				MAP7D1		CELA2B
				PARP15		CELF1
				CXCL3		CELF2
				CHST13		CELF3
				SAMSN1		CELP
				RASAL3		CELSR1
				CD27		CELSR2
				ADPRH		CELSR3
				ITGB1		CEMIP
				IFNAR2		CENPB
				CD300A		CENPC
				TNFAIP8L2		CENPE
				CXCL10		CENPF
				IFI44L		CENPI
				TYROBP		CENPX
				SEC24A		CEP104
				TGFBR2		CEP112
				CCL13		CEP131
				CYTIP		CEP135
				FBXL7		CEP152
				ZNF620		CEP162
				IL1RL1		CEP164
				TRANK1		CEP170
				NCF1		CEP170B
				LAPTM5		CEP250
				SCEL		CEP290
				OGFRL1		CEP350
				ANK2		CEP57
				GPR137B		CEP68
				FLI1		CERS6
				PCDH18		CES1
				VSIG4		CES2
				HTR2A		CETN1
				INHBA		CETN2
				KIR3DL3		CETN3
				CYP27A1		CETP
				CLEC4G		CFAP20
				SLC12A3		CFAP410
				KCNT2		CFB
				IL19		CFD
				NOTCH4		CFDP1
				PDZRN3		CFH
				KLRC1		CFHR2
				IL1A		CFHR3
				PCDHGA12		CFHR4
				AQP10		CFI
				MAN1C1		CFL1
				APOBEC3G		CFLAR
				VAMP5		CFP
				IL7R		CFTR
				LCK		CGA
				BST1		CGB1
				SLURP1		CGGBP1
				JAML		CGREF1
				GDF5		CGRRF1
				PRKCB		CH25H
				MVP		CHAD
				AMHR2		CHAF1A
				RIPOR2		CHAF1B
				PKIB		CHD1
				NEGR1		CHD1L
				VEGFD		CHD2
				FAM30A		CHD3
				LRRC25		CHD4
				DIXDC1		CHD5
				TLR4		CHD8
				SFN		CHD9
				TNFSF11		CHEK1
				PKHD1L1		CHEK2
				ITGAL		CHERP
				S100A7A		CHGA
				CD4		CHGB
				MFRP		CHI3L1
				VCAN		CHI3L2
				CCR7		CHIT1
				SECISBP2L		CHKA
				PRKG1		CHL1
				IL16		CHM
				PLA2G4E		CHML
				SOX17		CHMP1A
				CXCL6		CHMP2A
				PMP22		CHMP2B
				TMEM176B		CHMP7
				HIST1H3H		CHN1
				BTN3A3		CHN2
				A2M		CHP1
				FPR1		CHP2
				RPS6KA4		CHPF
				OLFML2B		CHRD
				TNFRSF25		CHRDL1
				FSCN1		CHRFAM7A
				NCKAP1L		CHRM3
				SHISAL1		CHRNA1
				TENM3		CHRNA2
				CCL3		CHRNA3
				KCNK13		CHRNA4
				KL		CHRNA5
				HCLS1		CHRNA6
				ITGA9		CHRNB1
				LY9		CHRNB2
				RASSF4		CHRNB3
				GBGT1		CHRNB4
				LTBR		CHRND
				PDE3B		CHRNE
				RAMP3		CHST1
				AMPD1		CHST10
				DHRS9		CHST15
				AKNA		CHST2
				HVCN1		CHST3
				COL10A1		CHST7
				KCNN3		CHSY1
				TCL1A		CHTOP
				ZBTB32		CHUK
				HLX		CIAO1
				XAF1		CIAPIN1
				SIGLEC10		CIB1
				HSP90AA1		CIB2
				AGTR1		CIC
				RGS5		CIITA
				VSIR		CILP
				AFF3		CIR1
				XCR1		CIRBP
				TRPV2		CITED1
				GLIS3		CITED2
				SLCO2B1		CIZ1
				ANGPTL1		CKAP4
				KIR2DL1		CKAP5
				ENOX1		CKB
				GGTA1P		CKM
				DOK5		CKMT2
				APOE		CKS1B
				PEG3		CKS2
				ENG		CLASP1
				RAPGEF6		CLASP2
				WARS		CLASRP
				CXCL5		CLBA1
				E2F5		CLC
				PIK3R5		CLCA1
				ZNF423		CLCA2
				CLNK		CLCC1
				SLAMF6		CLCN1
				IL12B		CLCN2
				ITGA5		CLCN3
				DCN		CLCN4
				UQCC2		CLCN5
				FASLG		CLCN6
				PTGDS		CLCN7
				FCER1G		CLCNKA
				UHMK1		CLCNKB
				APLNR		CLDN10
				ZNF660		CLDN14
				LIFR		CLDN18
				TNFRSF4		CLDN3
				ETS1		CLDN4
				JAK3		CLDN5
				CD40		CLDN7
				CCR10		CLDN8
				PODN		CLDN9
				HLA-DOB		CLDND1
				CORO1A		CLEC10A
				S100A9		CLEC11A
				MGP		CLEC16A
				NCOA2		CLEC2B
				CAV1		CLEC4M
				DKK2		CLGN
				PSMD8		CLIC1
				PPP1R13L		CLIC2
				CREBL2		CLIC4
				ALOX5		CLIC5
				SCN7A		CLINT1
				MPP1		CLIP1
				FZD4		CLIP2
				MAP1LC3C		CLIP3
				GIMAP6		CLK1
				ERCC6L2		CLK2
				B2M		CLK3
				KCNK6		CLMN
				SGIP1		CLN3
				SON		CLN5
				ACVR1		CLNS1A
				LILRB3		CLOCK
				PLEKHO1		CLP1
				IL12RB1		CLPP
				RTKN2		CLPS
				RASGRP2		CLPTM1
				APOBEC3H		CLPX
				RAET1L		CLSTN1
				DDX60		CLSTN3
				ZNF366		CLTA
				CTF1		CLTB
				TPSD1		CLTC
				ACKR1		CLTCL1
				IFNLR1		CLU
				MFAP4		CLUAP1
				LSP1		CLUH
				SDCBP2		CLUL1
				PDZK1IP1		CMA1
				SNED1		CMAHP
				CCDC102B		CMKLR1
				GAS7		CMTR1
				TGFB3		CNBP
				ICAM1		CNGA1
				MYCT1		CNGA3
				HERC6		CNGB1
				BHLHE22		CNIH1
				SPRR2G		CNIH3
				GPR4		CNKSR1
				UNC93B1		CNKSR2
				MAGEL2		CNMD
				HS3ST1		CNN1
				IGSF21		CNN3
				SLAMF8		CNNM2
				EDNRA		CNOT1
				APOL6		CNOT2
				LYL1		CNOT3
				ASGR2		CNOT4
				TSPAN4		CNOT8
				AIM2		CNOT9
				HSD17B14		CNP
				PSMC1		CNPPD1
				ST3GAL2		CNPY3
				PLA2G7		CNR1
				BCL2A1		CNR2
				PYHIN1		CNTF
				STK33		CNTFR
				EVI2A		CNTN1
				GJB3		CNTN2
				PATZ1		CNTN5
				ANKRD17		CNTN6
				CLCF1		CNTNAP2
				FGD5		CNTRL
				TMEM204		COA1
				XCL2		COASY
				MEF2C		COBL
				IQGAP2		COBLL1
				SIGLEC6		COCH
				NID2		COG2
				HLA-DPB1		COG4
				CD53		COG5
				SH2B3		COG7
				HLA-C		COIL
				PNOC		COL10A1
				ITGA8		COL11A1
				IL17RB		COL11A2
				ASXL3		COL13A1
				MFNG		COL14A1
				IFNA13		COL15A1
				AHCYL2		COL16A1
				CD84		COL17A1
				HNMT		COL18A1
				RTP4		COL19A1
				TIMM50		COL1A1
				TGFBI		COL1A2
				MX1		COL21A1
				DDI2		COL2A1
				ATE1		COL3A1
				EPOR		COL4A1
				DNAJC5B		COL4A2
				GAPT		COL4A3
				CALD1		COL4A4
				TNFRSF18		COL4A5
				GRIN3A		COL4A6
				CCL5		COL5A1
				PPBP		COL5A2
				ADAMTS2		COL6A1
				DLL4		COL6A2
				ADGRE5		COL6A3
				SLC6A12		COL7A1
				APBB1IP		COL8A1
				NAP1L3		COL9A1
				DAAM2		COL9A2
				STK17B		COL9A3
				ABCC9		COLEC10
				RASL12		COLGALT2
				MICAL2		COLQ
				TNFSF15		COMMD4
				MPEG1		COMP
				C1QC		COMT
				MRPS12		COPA
				FKBP7		COPB1
				BMPR1A		COPB2
				CLEC11A		COPE
				CX3CR1		COPS2
				EPSTI1		COPS3
				MEDAG		COPS5
				BMPR2		COPS6
				CCR5		COPS7A
				ARHGAP4		COPS8
				CR2		COQ2
				SOWAHD		COQ7
				CMKLR1		COQ9
				FCRL6		CORO1A
				EGF		CORO2A
				ADGRE2		CORO2B
				CCR3		CORT
				NCR1		COX10
				MXRA8		COX11
				CSF2		COX20
				RASGRP4		COX4I1
				PIM2		COX5A
				REL		COX5B
				FOLR2		COX6A1
				NCF2		COX6A2
				EHD2		COX6B1
				SEM1		COX6C
				PTPRCAP		COX7A1
				FERMT2		COX7A2
				JAM3		COX7A2L
				ITGA4		COX7B
				COL1A1		COX7C
				PLCB2		COX8A
				SNRPF		CP
				FCN1		CPA1
				SIGLEC14		CPA2
				AP1S2		CPA3
				NR1H3		CPB1
				OMD		CPB2
				PKD2L1		CPD
				IL1R2		CPE
				CSMD2		CPEB3
				CACNA1C		CPLX2
				BMPR1B		CPM
				GNAI2		CPN1
				TMEM156		CPN2
				LILRB4		CPNE1
				TPSB2		CPNE3
				S1PR4		CPNE6
				ADAMDEC1		CPOX
				TOX		CPQ
				CNFN		CPS1
				TIGIT		CPSF1
				NUGGC		CPSF4
				PDGFA		CPSF6
				TM4SF18		CPT1A
				UNC13D		CPT1B
				ADGRF5		CPVL
				CPA3		CPZ
				CD274		CR1
				RCSD1		CR2
				SIGLEC5		CRABP1
				CCL26		CRABP2
				CCR8		CRACR2B
				SLC25A53		CRADD
				MARCO		CRAT
				IKZF1		CRCP
				PHACTR1		CREB1
				ITGA1		CREB3
				ADAM6		CREB3L1
				TAP1		CREB3L2
				ARHGAP30		CREB5
				PRKAR2A		CREBBP
				ARHGEF37		CREBL2
				CLEC4D		CREBZF
				TEK		CREG1
				LGMN		CRELD1
				SULT1C4		CREM
				HLA-DRB5		CRH
				DOCK11		CRHBP
				LILRP2		CRHR1
				CD37		CRHR2
				CR1		CRIM1
				HIST1H2AM		CRIP1
				ZNF683		CRIP2
				ANKRD44		CRISP1
				GIMAP1		CRISP2
				IL2RA		CRISP3
				APOL3		CRK
				IPCEF1		CRKL
				CMAHP		CRLF1
				VEGFC		CRLF3
				BNC2		CRMP1
				SIRPB2		CROCC
				SP140		CROT
				GATA3		CRP
				CCL14		CRTAM
				NFKBID		CRTAP
				CTSK		CRTC1
				KRT6B		CRX
				LILRA2		CRY1
				IKZF3		CRY2
				TLR8		CRYAA
				CLEC10A		CRYAB
				SELL		CRYBA1
				MRO		CRYBA4
				LATS2		CRYBB1
				COL8A1		CRYBB2
				GPR157		CRYBB3
				CPZ		CRYBG1
				RTRAF		CRYBG3
				IL6R		CRYGA
				USP51		CRYGC
				CARD9		CRYGD
				IL1RAP		CRYM
				TNFRSF10D		CRYZ
				TTC16		CS
				CXCL12		CSDC2
				C10ORF99		CSE1L
				GVINP1		CSF1
				GFRA3		CSF1R
				MAN1A2		CSF2
				CD8B		CSF2RA
				IL6ST		CSF2RB
				NRXN3		CSF3
				IL17A		CSF3R
				IL15		CSHL1
				NDNF		CSK
				EPO		CSN1S1
				CCL4		CSN2
				EDA		CSN3
				LCE3D		CSNK1A1
				CD5		CSNK1D
				SH2D3C		CSNK1G2
				GZMB		CSNK2A1
				GRAP2		CSNK2A2
				GPRIN3		CSNK2B
				GATA2		CSPG4
				ADGRD1		CSPG5
				SH2D2A		CSRNP2
				GHR		CSRP1
				CXCR5		CSRP2
				SLC2A5		CSRP3
				PARP12		CST1
				PIP4K2A		CST3
				TNFSF13B		CST5
				PTGIR		CST6
				IRF9		CST7
				C2		CSTA
				IL2RG		CSTB
				GNG11		CSTF1
				TNS3		CSTF2
				TMEM176A		CSTF2T
				EIF2A		CSTF3
				PPL		CT62
				KIRREL1		CTAG2
				S100A16		CTBP1
				COL4A2		CTBP2
				NFYA		CTBS
				IFI6		CTCF
				PSME3		CTDNEP1
				S100A2		CTDP1
				C19ORF38		CTDSP2
				ULBP3		CTDSPL
				LY96		CTF1
				GJB5		CTH
				DUSP16		CTIF
				RAB42		CTNNA1
				CD86		CTNNA2
				C5AR1		CTNNAL1
				ADAMTS5		CTNNB1
				ANTXR1		CTNNBIP1
				LIF		CTNND2
				ART4		CTNS
				P2RY2		CTPS1
				GNA15		CTR9
				CDSN		CTRB2
				P2RX5		CTRC
				CNRIP1		CTRL
				IFITM3		CTSA
				PDGFRL		CTSB
				FILIP1L		CTSC
				CCL17		CTSD
				TNIP3		CTSE
				SLA2		CTSF
				ADGRE4P		CTSG
				DOK2		CTSH
				ULBP1		CTSK
				CXCR4		CTSL
				PSMD7		CTSO
				TBXA2R		CTSS
				ST6GALNAC3		CTSV
				AEBP1		CTSW
				CTSE		CTSZ
				FLVCR2		CTTN
				ASPN		CUBN
				PCED1B		CUL1
				IFNL1		CUL2
				GALNT15		CUL3
				HAVCR1		CUL4A
				EFEMP2		CUL4B
				FAM177B		CUL5
				HLA-DMB		CUL7
				ITGA11		CUL9
				ZC3H12D		CUX1
				C1ORF116		CUX2
				GPR15		CX3CL1
				COL6A5		CX3CR1
				CCL18		CXADR
				HRH2		CXCL1
				HSPA8		CXCL10
				RNF166		CXCL11
				ASAH1		CXCL12
				OSM		CXCL13
				SLIT3		CXCL2
				MS4A6A		CXCL3
				PEAK3		CXCL5
				PSMB9		CXCL6
				SLC11A1		CXCL8
				PTGDR		CXCL9
				HLA-DOA		CXCR1
				PSME1		CXCR2
				LRRC17		CXCR3
				ZNF469		CXCR4
				CTSB		CXCR5
				RASSF6		CXCR6
				MS4A1		CYB561
				ZNF521		CYB561D2
				TLR9		CYB5A
				CD1D		CYB5B
				ZNF827		CYB5R1
				DMXL2		CYB5R3
				OGN		CYBA
				GTF2A1		CYBB
				MMP12		CYC1
				ACHE		CYCS
				KLHL11		CYFIP1
				MMP16		CYFIP2
				ADCYAP1		CYHR1
				OLR1		CYLC1
				RAB39B		CYLC2
				APBB2		CYLD
				ENTPD1		CYP11A1
				ADGRG5		CYP11B1
				MMP9		CYP11B2
				RGPD1		CYP17A1
				HPGD		CYP19A1
				TTC24		CYP1A1
				TCN2		CYP1A2
				SASH3		CYP1B1
				POSTN		CYP24A1
				HSH2D		CYP26A1
				CD19		CYP27A1
				ZBTB10		CYP27B1
				ARHGAP15		CYP2A13
				NIPAL4		CYP2A7
				RUNX3		CYP2B6
				PIEZO2		CYP2B7P
				KCNJ10		CYP2C18
				GPBAR1		CYP2C19
				GPR34		CYP2C8
				ARRDC5		CYP2C9
				MMP1		CYP2D6
				IFNAR1		CYP2E1
				MICB		CYP2F1
				IFI30		CYP2J2
				FAM83A-AS1		CYP3A4
				GIMAP4		CYP3A5
				CCL22		CYP3A7
				CARD11		CYP4A11
				DCANP1		CYP4B1
				CDKL5		CYP4F11
				AOAH		CYP4F12
				JAKMIP1		CYP4F2
				SUCNR1		CYP4F3
				MRPL55		CYP51A1
				HLA-DQA2		CYP7A1
				KLRC4		CYP7B1
				CANX		CYTH1
				TRAF3IP3		CYTH2
				IL6		CYTH3
				CETP		CYTIP
				TNFSF10		CZIB
				C1QB		DAAM1
				IRF1		DAAM2
				NAIP		DAB2
				P2RY14		DACH1
				MMRN1		DAD1
				SAMD9		DAG1
				CCL24		DAGLA
				CD6		DAO
				ACP5		DAP
				TNFRSF1A		DAP3
				GPR78		DAPK1
				AREG		DAPK2
				GATA1		DAPK3
				CAMK4		DARS
				CD52		DAXX
				IFNB1		DAZ1
				ZNF804A		DAZAP2
				SFTPB		DAZL
				SNX20		DBF4
				ROCK2		DBH
				HK3		DBI
				SAMD14		DBN1
				MR1		DBP
				ITGB3		DBT
				HIPK3		DCAF1
				LMOD1		DCAF11
				B3GAT1		DCAF4
				POU2AF1		DCAF7
				AOC3		DCAF8
				PLEKHN1		DCBLD2
				PUS10		DCC
				KIR3DL2		DCHS1
				TIE1		DCK
				TREM2		DCLK1
				FPR2		DCLRE1A
				THBS2		DCP2
				SOD3		DCT
				CLEC1A		DCTD
				TBX21		DCTN2
				CXCL13		DCTN3
				STARD8		DCTN5
				IFFO1		DCTN6
				CST7		DCUN1D4
				CERKL		DCX
				TAPBP		DDAH1
				RRN3P2		DDAH2
				CYSRT1		DDB1
				LMTK2		DDB2
				CD226		DDC
				LGI2		DDHD2
				PSMD4		DDIT3
				CSF2RB		DDIT4
				TNFRSF9		DDN
				CPED1		DDO
				TPSAB1		DDOST
				CCL15		DDR1
				SELP		DDR2
				NOX4		DDT
				DUOXA1		DDX1
				ITK		DDX10
				RGS18		DDX11
				TNFRSF11A		DDX17
				CYTH4		DDX18
				TNN		DDX19A
				SLC45A3		DDX19B
				FICD		DDX21
				MXD1		DDX23
				IL15RA		DDX27
				SDS		DDX28
				BATF3		DDX39A
						DDX3X
						DDX3Y
						DDX42
						DDX46
						DDX49
						DDX51
						DDX52
						DDX6
						DEAF1
						DECR1
						DEDD
						DEFA4
						DEFA5
						DEFA6
						DEFB1
						DEGS1
						DEK
						DELE1
						DENND3
						DENND4A
						DENND4B
						DENND5A
						DEPDC5
						DEPP1
						DES
						DESI1
						DESI2
						DEXI
						DFFA
						DFFB
						DGAT1
						DGCR2
						DGCR5
						DGCR6
						DGCR6L
						DGCR9
						DGKA
						DGKB
						DGKD
						DGKE
[truncated: 6,648 more rows]
